# Supplementary material for: Focus on Chemistry of the 10-Dioxane-nido-7,8-dicarba-undecahydrido Undecaborate Zwitterion; Exceptionally Easy Abstraction of Hydrogen Bridge and Double-Action Pathways Observed in Ring Cleavage Reactions with OH− as Nucleophile
Source: MDPI journal article supplement (doi:10.3390/molecules25040814), 2020-02-13
Supplement: s1 [file s1]

# Supporting Material

**Focus on chemistry of the 10-dioxane-*nido*- 7,8-dicarba-undecahydrido undecaborate zwitterion; exceptionally easy abstraction of hydrogen bridge and double-action pathways observed in ring cleavage reactions with OH<sup>-</sup> as nucleophile.**

**Mário Bakardjiev<sup>1,#</sup>, Suzan El Anwar<sup>1,#</sup>, Dmytro Bovol<sup>1</sup>, Zdeňka Růžicková<sup>2</sup> and Bohumír Gruner<sup>1,\*</sup>**

<sup>1</sup> Institute of Inorganic Chemistry of Czech Academy of Sciences, 25068 Řež, Czech Republic, [gruner@iic.cas.cz](mailto:gruner@iic.cas.cz)

<sup>2</sup> Faculty of Chemical Technology, University of Pardubice, Studentská 95, Pardubice, Czech Republic.

\* Correspondence: [gruner@iic.cas.cz](mailto:gruner@iic.cas.cz)

# These authors contributed equally

## Content

|                                                  |       |
|--------------------------------------------------|-------|
| Crystallography.....                             | 2     |
| NMR Spectra of compounds 1-15, Figs. S1-S16..... | 3-26  |
| MS Spectra of compounds 1-15, Figs. S17-S30..... | 27-33 |

## I. Crystallography

**Table 1.** Data collection and structure refinement for compounds **1** and **2**.

|                                            |                                                                                                                 |                                                                                                                 |
|--------------------------------------------|-----------------------------------------------------------------------------------------------------------------|-----------------------------------------------------------------------------------------------------------------|
| <b>Theta range for data collection</b>     | 2.37 to 27.51°                                                                                                  | 2.11 to 27.54°                                                                                                  |
| <b>Index ranges</b>                        | -9≤h≤10, -14≤k≤14, -17≤l≤16                                                                                     | -9≤h≤9, -16≤k≤16, -19≤l≤19                                                                                      |
| <b>Reflections collected</b>               | 12334                                                                                                           | 32867                                                                                                           |
| <b>Independent reflections</b>             | 2895 [R(int) = 0.0587]                                                                                          | 3123 [R(int) = 0.0548]                                                                                          |
| <b>Coverage of independent reflections</b> | 99.8%                                                                                                           | 99.8%                                                                                                           |
| <b>Absorption correction</b>               | Multi-Scan                                                                                                      | Multi-Scan                                                                                                      |
| <b>Structure solution technique</b>        | direct methods                                                                                                  | direct methods                                                                                                  |
| <b>Structure solution program</b>          | XT, VERSION 2014/5                                                                                              | XT, VERSION 2014/5                                                                                              |
| <b>Refinement method</b>                   | Full-matrix least-squares on F <sup>2</sup>                                                                     | Full-matrix least-squares on F <sup>2</sup>                                                                     |
| <b>Refinement program</b>                  | SHELXL-2014/7 (Sheldrick, 2014)                                                                                 | SHELXL-2014/7 (Sheldrick, 2014)                                                                                 |
| <b>Function minimized</b>                  | $\Sigma w(F_o^2 - F_c^2)^2$                                                                                     | $\Sigma w(F_o^2 - F_c^2)^2$                                                                                     |
| <b>Data / restraints / parameters</b>      | 2895 / 0 / 198                                                                                                  | 3123 / 0 / 208                                                                                                  |
| <b>Goodness-of-fit on F<sup>2</sup></b>    | 1.079                                                                                                           | 1.171                                                                                                           |
| <b>Final R indices</b>                     | 2487 data; I>2σ(I), R1 = 0.0442, wR2 = 0.0928                                                                   | 2655 data; I>2σ(I), R1 = 0.0521, wR2 = 0.1296                                                                   |
| <b>Weighting scheme</b>                    | all data R1 = 0.0564, wR2 = 0.0978<br>$w=1/[\sigma^2(F_o^2)+(0.0501P)^2+0.1134P]$<br>where $P=(F_o^2+2F_c^2)/3$ | all data R1 = 0.0637, wR2 = 0.1349<br>$w=1/[\sigma^2(F_o^2)+(0.0549P)^2+0.7643P]$<br>where $P=(F_o^2+2F_c^2)/3$ |
| <b>Largest diff. peak and hole</b>         | 0.143 and -0.268 eÅ <sup>-3</sup>                                                                               | 0.284 and -0.227 eÅ <sup>-3</sup>                                                                               |
| <b>R.M.S. deviation from mean</b>          | 0.051 eÅ <sup>-3</sup>                                                                                          | 0.056 eÅ <sup>-3</sup>                                                                                          |

## II. NMR Spectra

### Deprotonation of compound **1**<sup>-</sup>

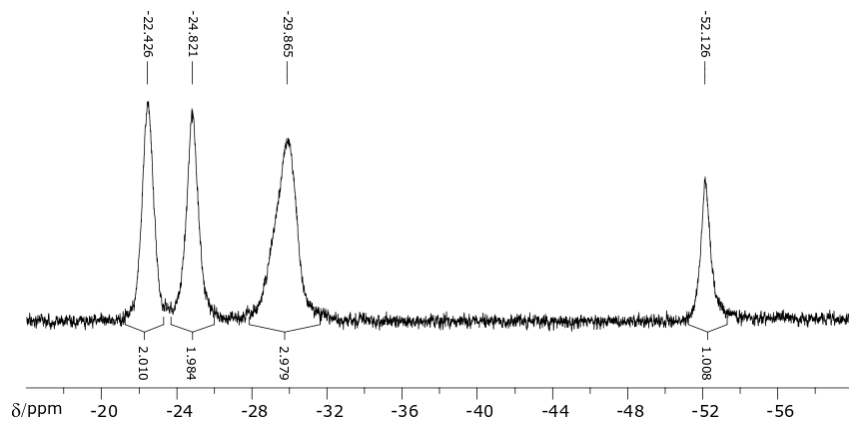

Fig S1a. <sup>11</sup>B NMR of deprotonated anion **1**<sup>-</sup> (in CD<sub>3</sub>CN-D<sub>2</sub>O)

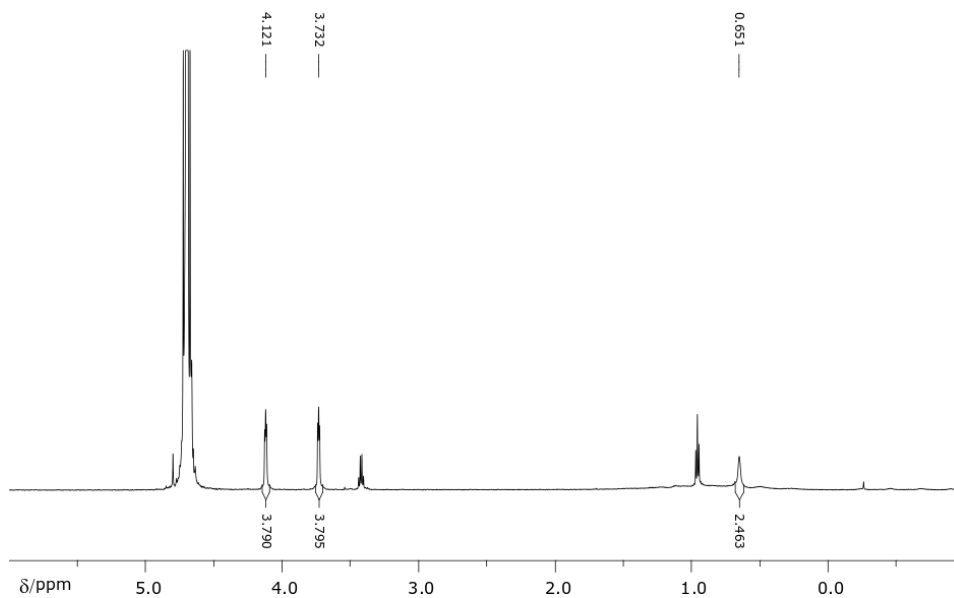

Fig S1b. <sup>1</sup>H NMR of deprotonated anion **1**<sup>-</sup> (in CD<sub>3</sub>CN-D<sub>2</sub>O)

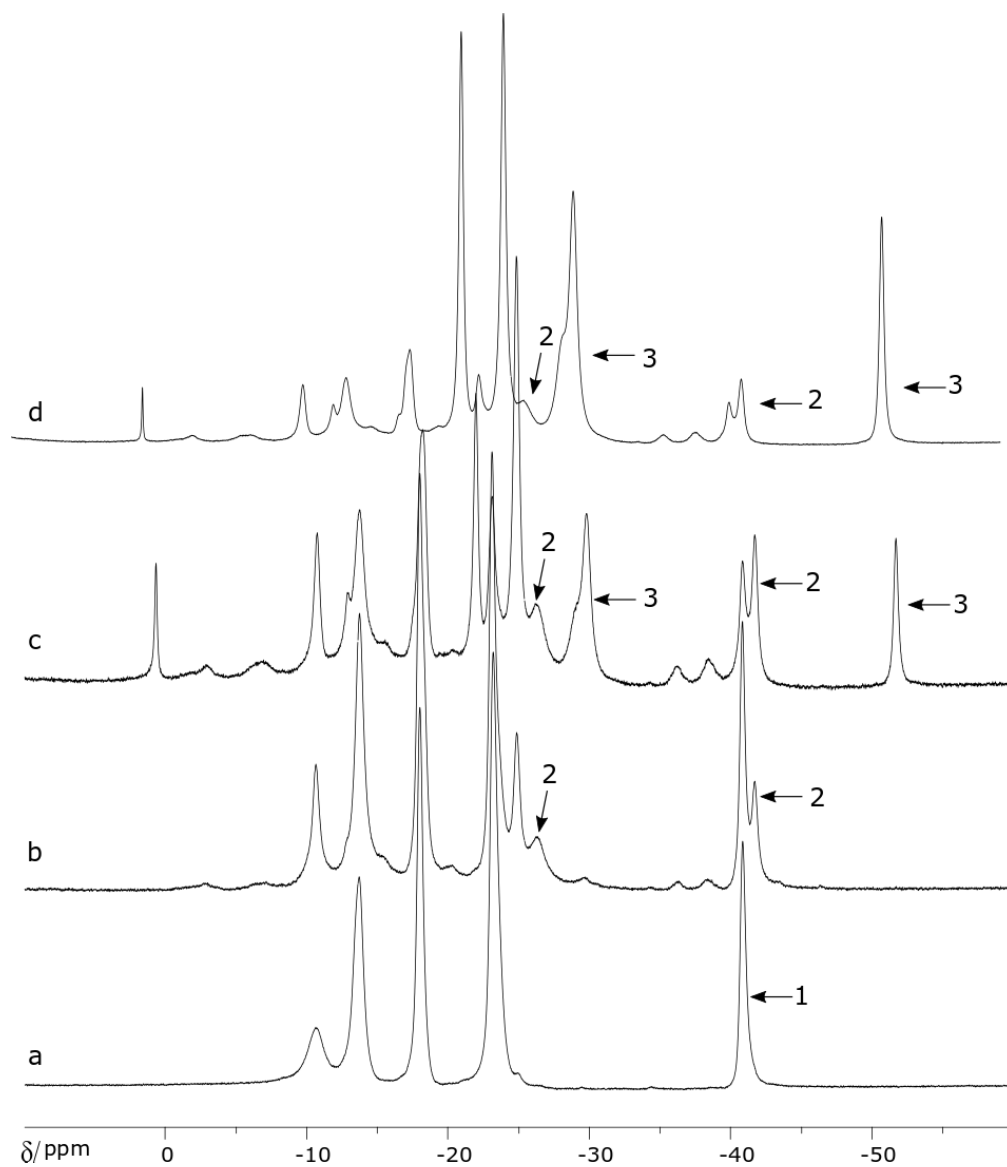

**Fig S2.**  $^{11}\text{B}$  NMR spectrum of deprotonated anion  $1^-$  (in  $\text{THF}_8\text{-D}_2\text{O}$  1: 1 b.v.), from bottom to top: a compound 1, b  $1 + \frac{1}{2}$  eq KOH, c  $1 + 1$  eq KOH, d  $1 + 1.5$  eq KOH, peaks marked with numbers 2 and 3 correspond: 2- exchange of extra hydrogen atom for deuterium in from  $\text{D}_2\text{O}$ , 3- to the deprotonated anionic form  $1^-$ .

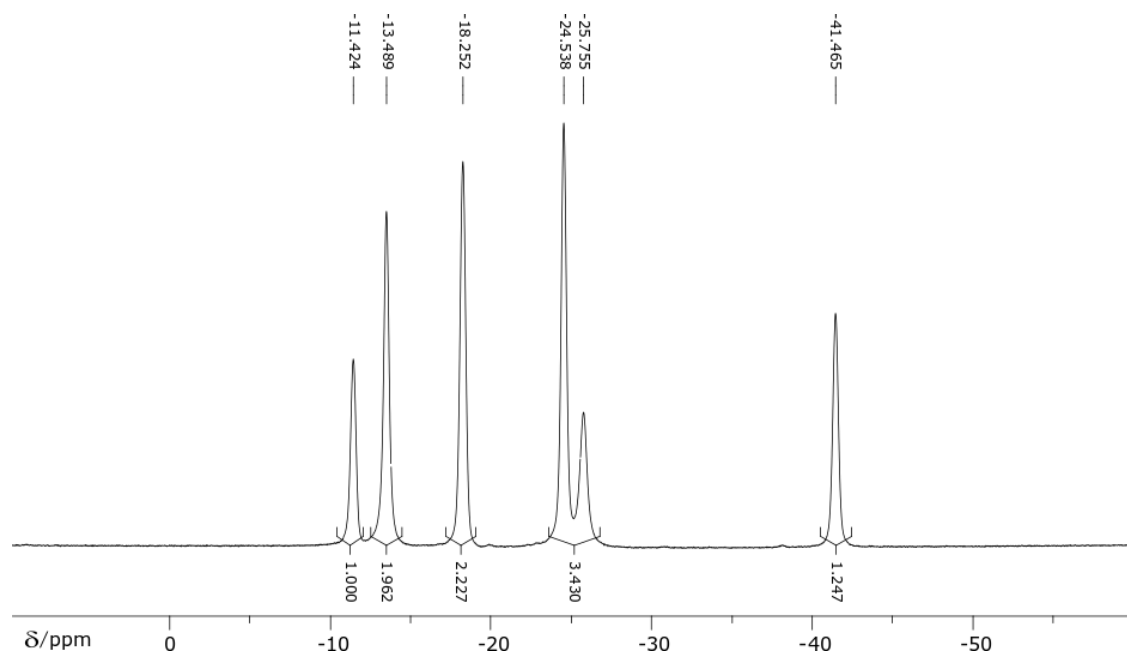

Fig S3a.  $^{11}\text{B}$  NMR of compound 2

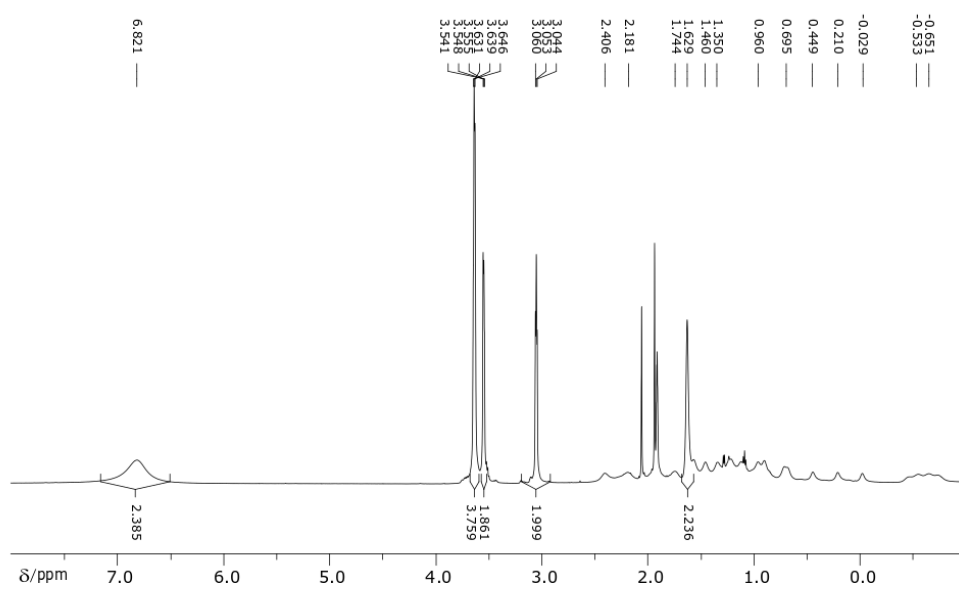

Fig S3b.  $^1\text{H}$  NMR of compound 2

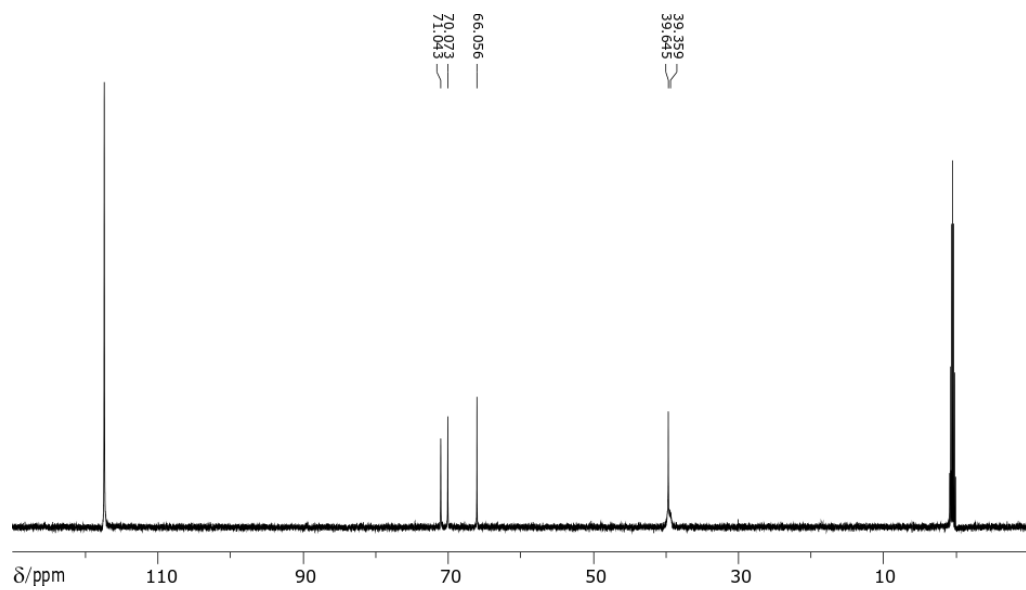

Fig S3c.  $^{13}\text{C}$  NMR of compound **2**

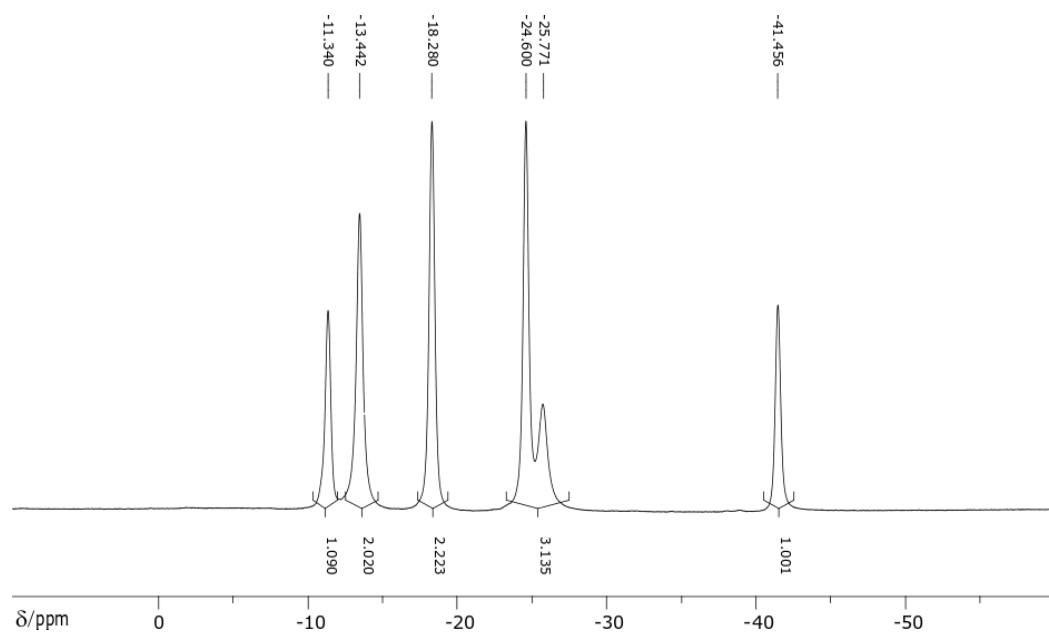

Fig S4a.  $^{11}\text{B}$  NMR of compound **3**

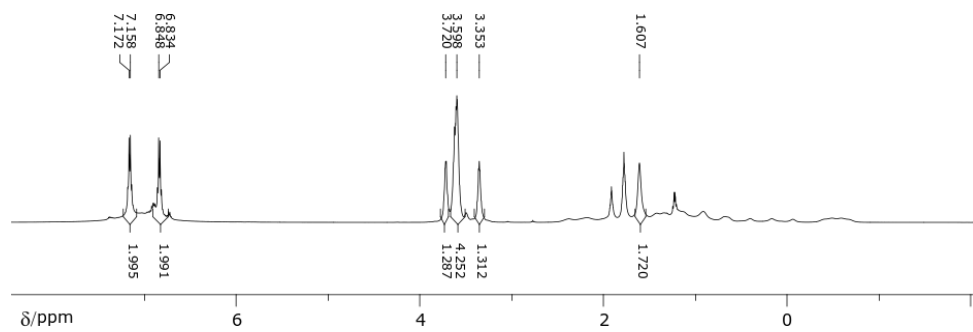

Fig S4b. <sup>1</sup>H NMR of compound **3**

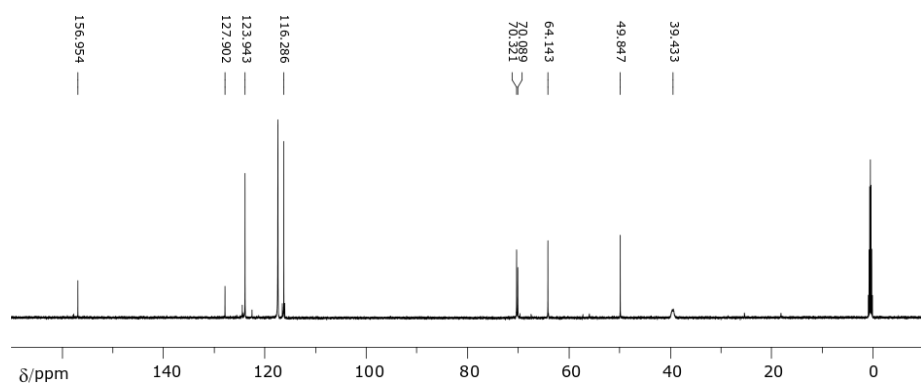

Fig S4c. <sup>13</sup>C NMR of compound **3**

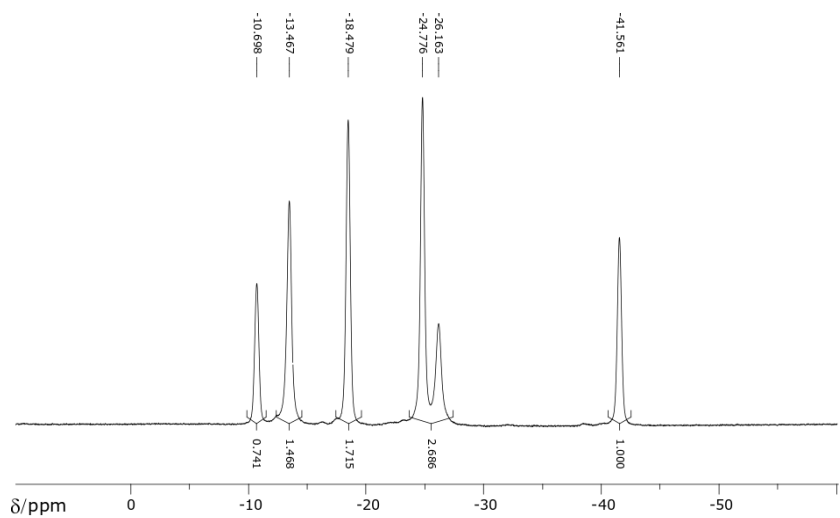

Fig S5a. <sup>11</sup>B NMR of compound **[HOC<sub>6</sub>H<sub>4</sub>NH<sub>3</sub>]**4****

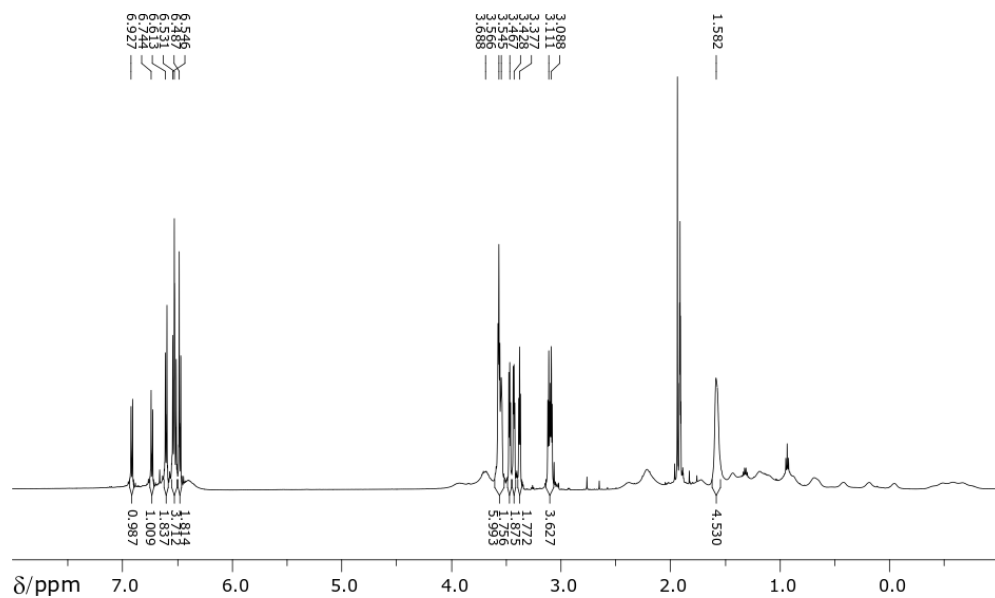

Fig S5b. <sup>1</sup>H NMR of compound [HOC<sub>6</sub>H<sub>4</sub>NH<sub>3</sub>]**4**

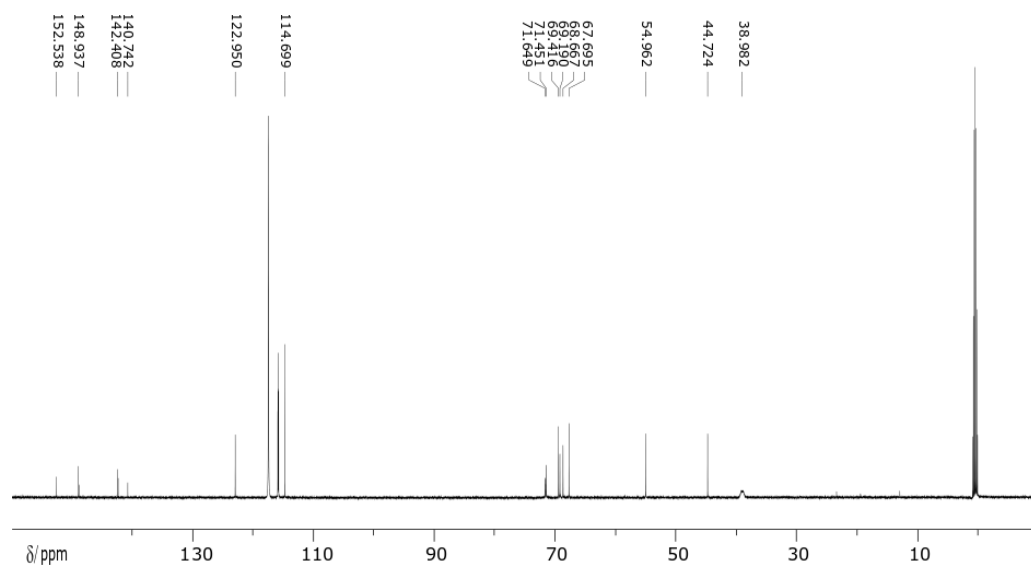

Fig S5c. <sup>13</sup>C NMR of compound [HOC<sub>6</sub>H<sub>4</sub>NH<sub>3</sub>]**4**



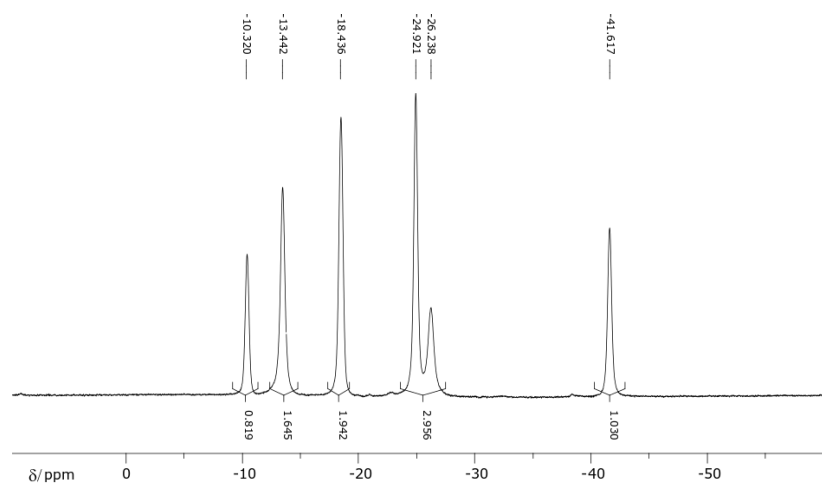

Fig S5d.  $^{11}\text{B}$  NMR of compound K4

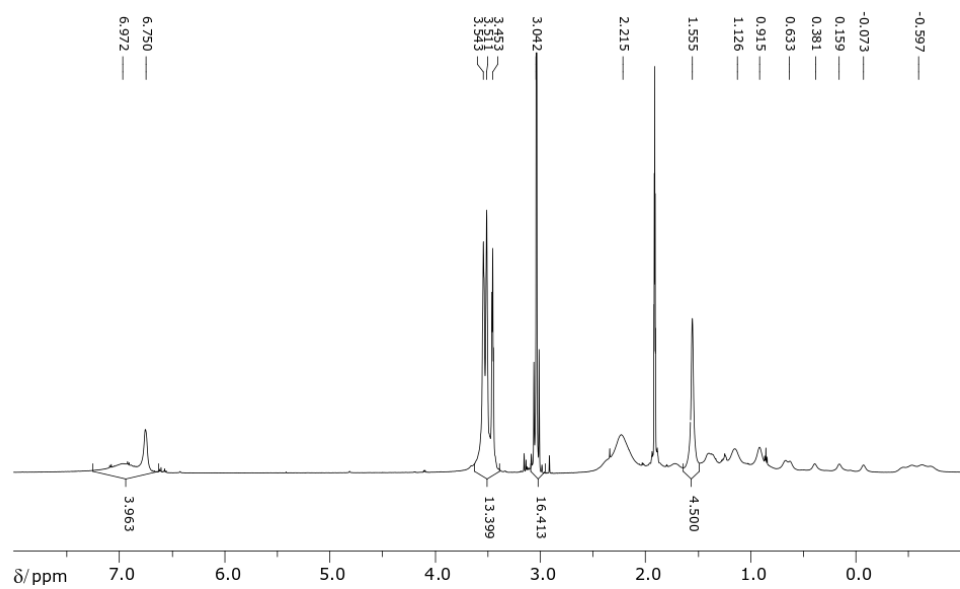

Fig S5e.  $^1\text{H}$  NMR of compound K4

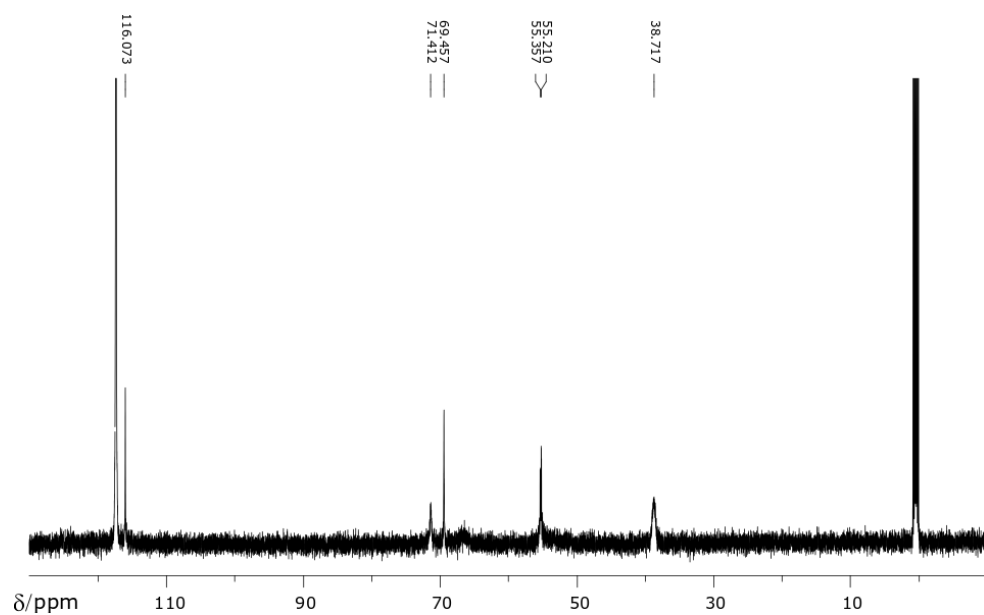

Fig S5f.  $^{13}\text{C}$  NMR of compound K4

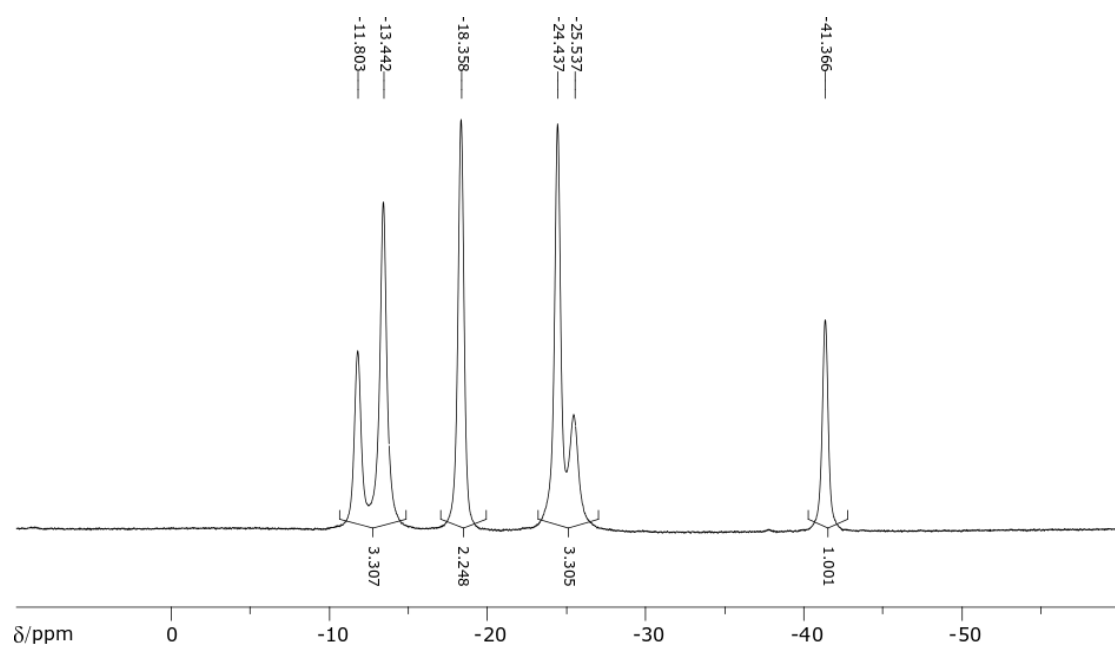

Fig S6a.  $^{11}\text{B}$  NMR of compound 5 (zwitterion)

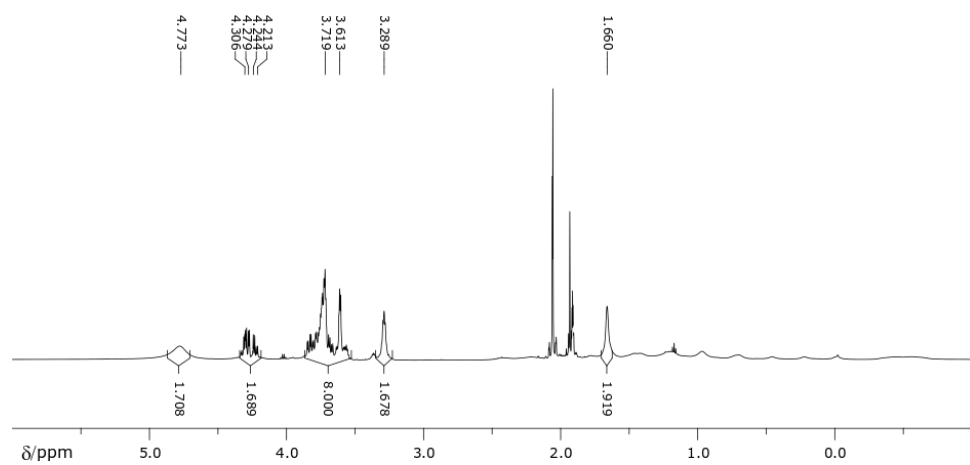

Fig S6b. <sup>1</sup>H NMR of compound 5 (zwitterion)

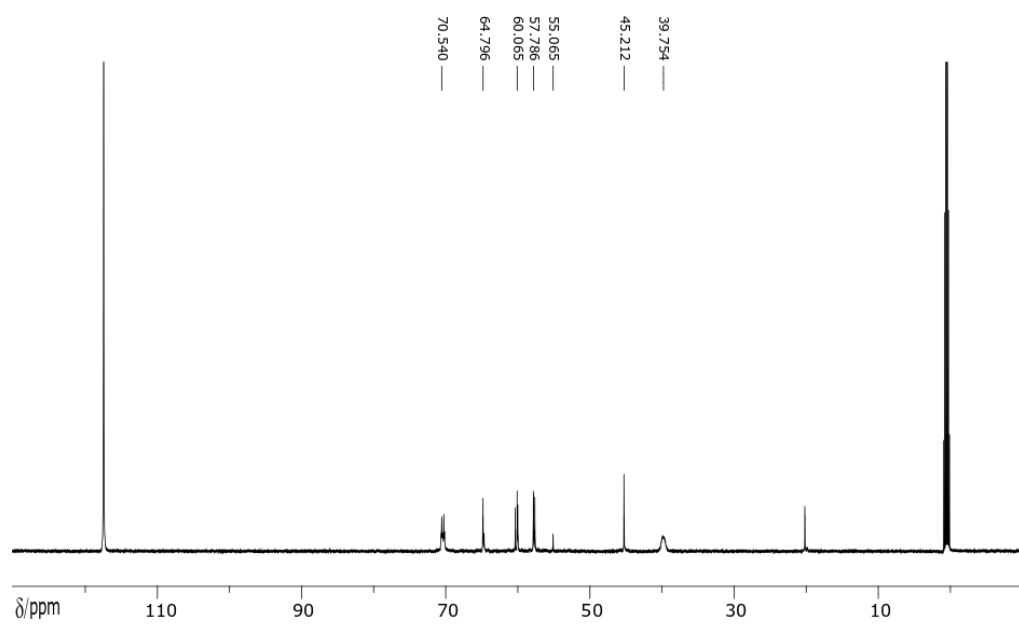

Fig S6c. <sup>13</sup>C NMR of compound 5 (zwitterion)

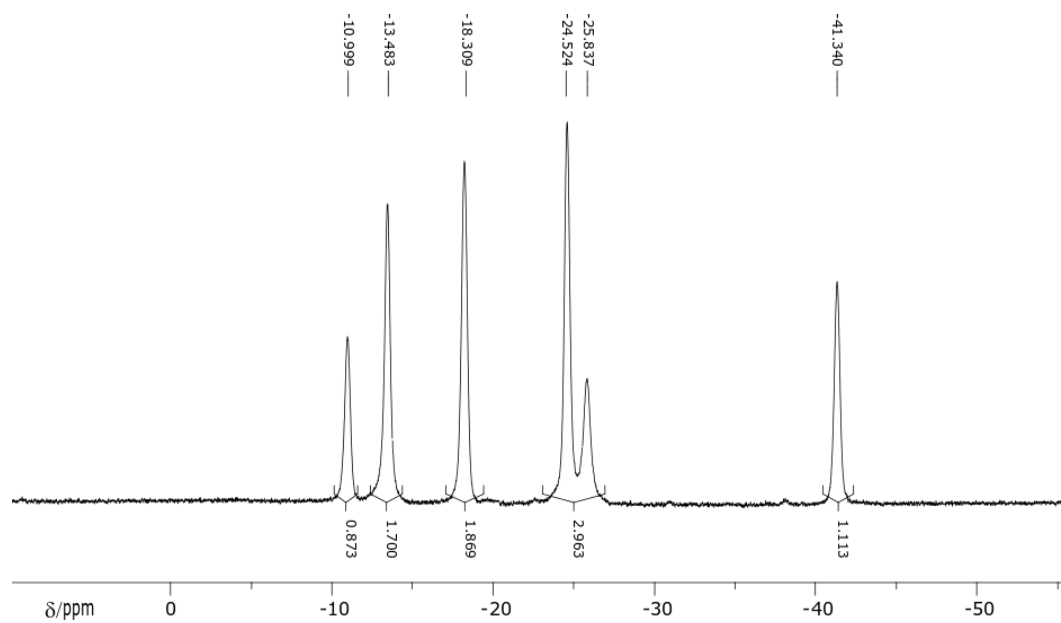

Fig S7a.  $^{11}\text{B}$  NMR of compound **6<sup>-</sup>**

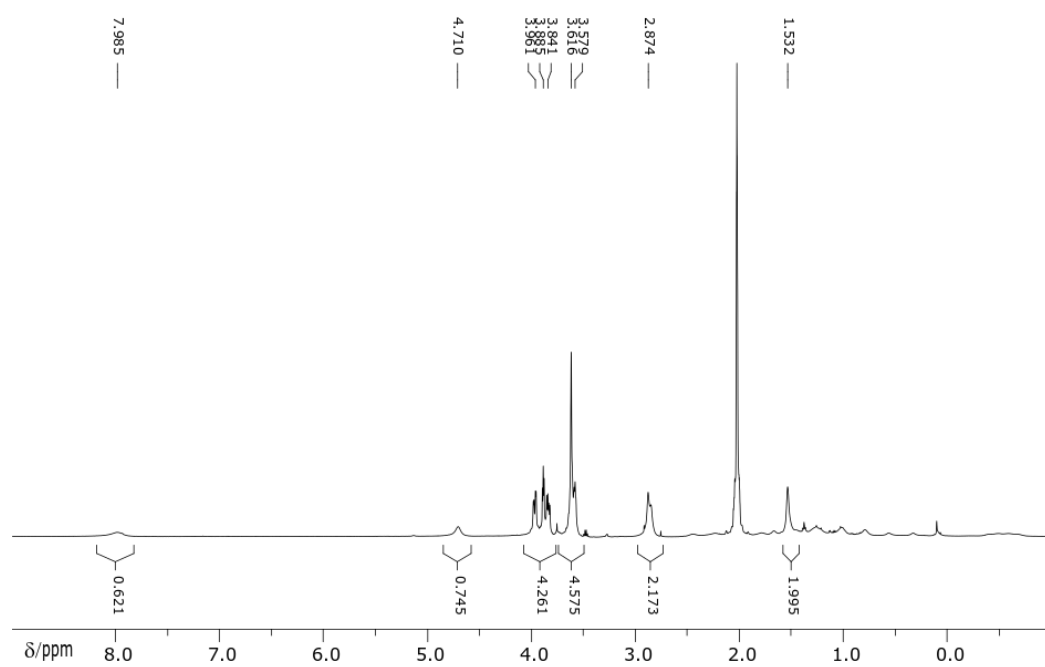

Fig S7b.  $^1\text{H}$  NMR of compound **6<sup>-</sup>**

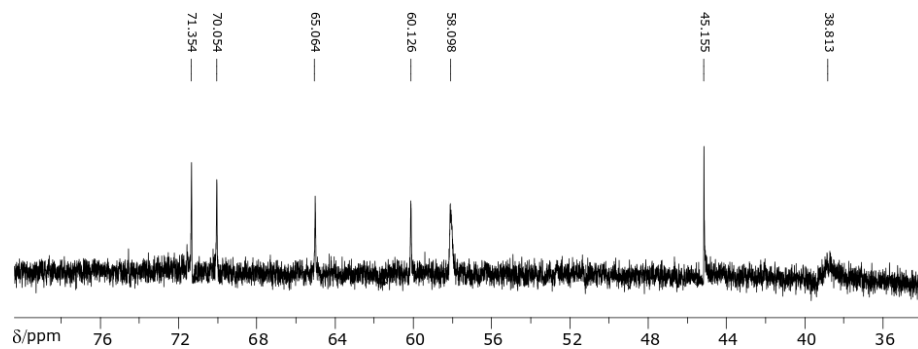

Fig S7c. <sup>13</sup>C NMR of compound 6<sup>-</sup>

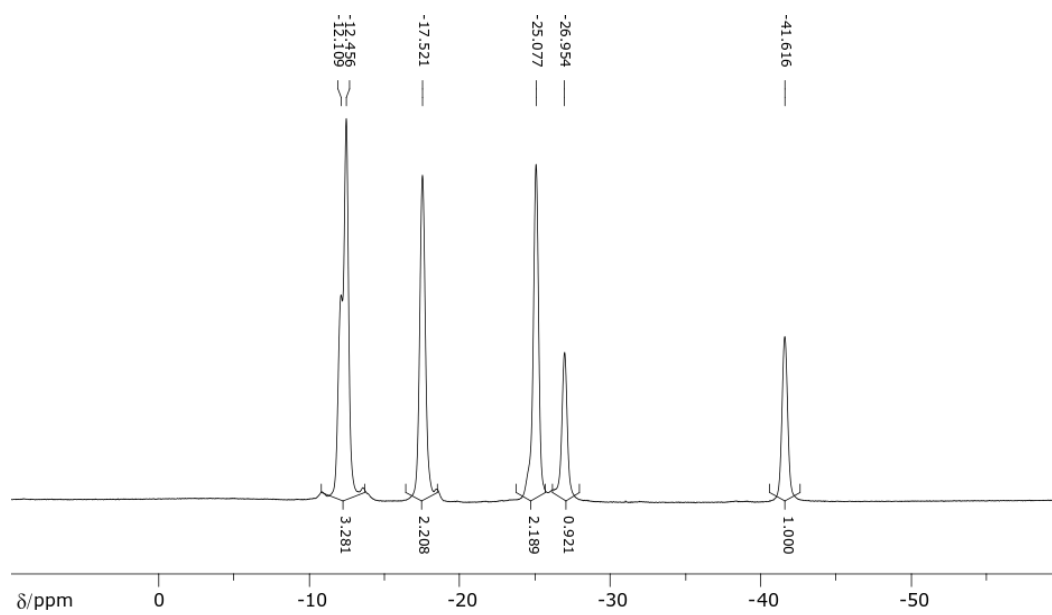

Fig S8a. <sup>11</sup>B NMR of compound 7<sup>-</sup>

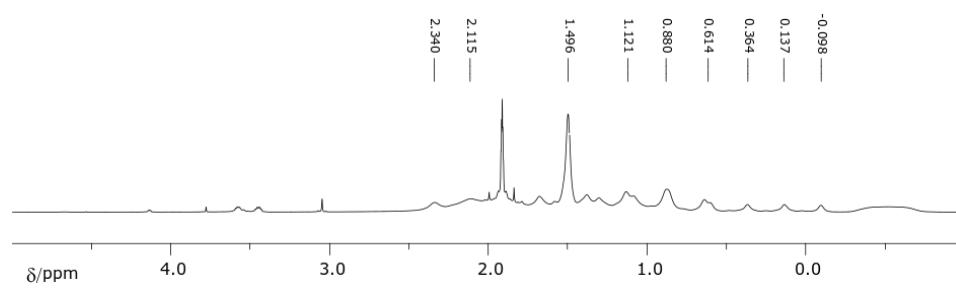

Fig S8b.  $^1\text{H}$  NMR of compound **7**

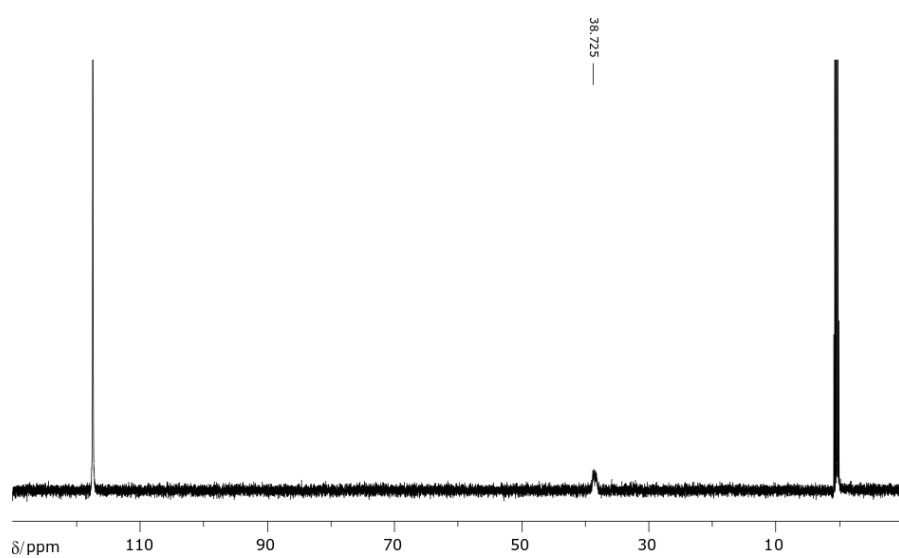

Fig S8c.  $^{13}\text{C}$  NMR of compound **7**

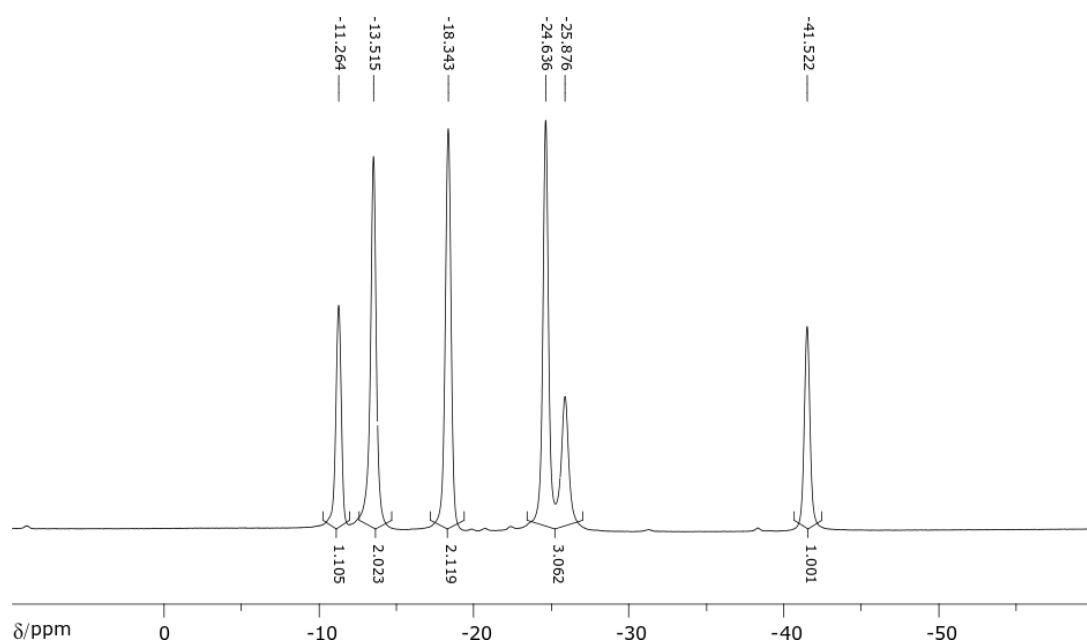

Fig S9a.  $^{11}\text{B}$  NMR of compound **8<sup>-</sup>**

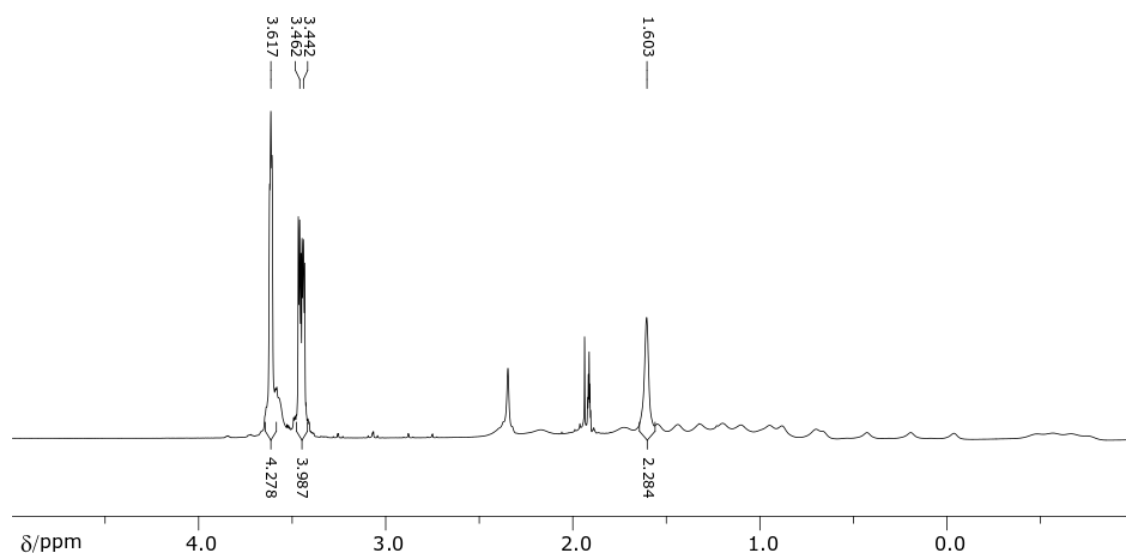

Fig S9b.  $^1\text{H}$  NMR of compound **8<sup>-</sup>**

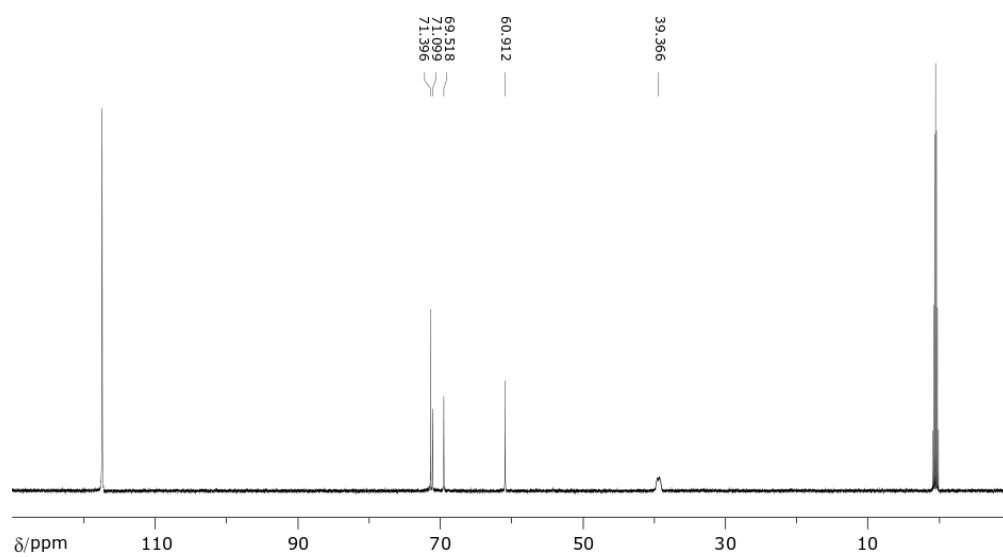

Fig S9c.  $^{13}\text{C}$  NMR of compound **8<sup>-</sup>**

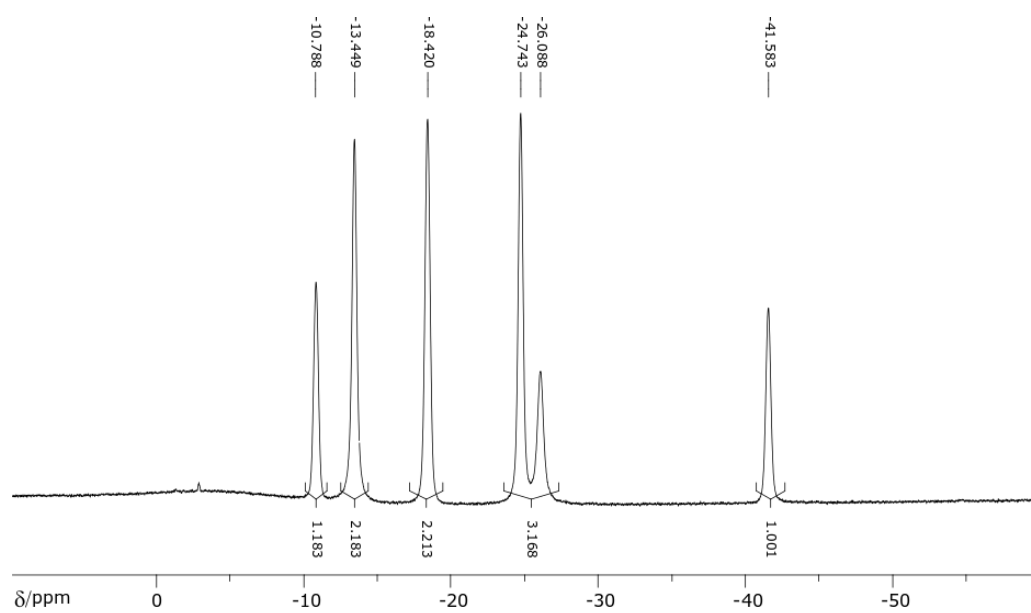

Fig S10a.  $^{11}\text{B}$  NMR of compound **9<sup>-</sup>**



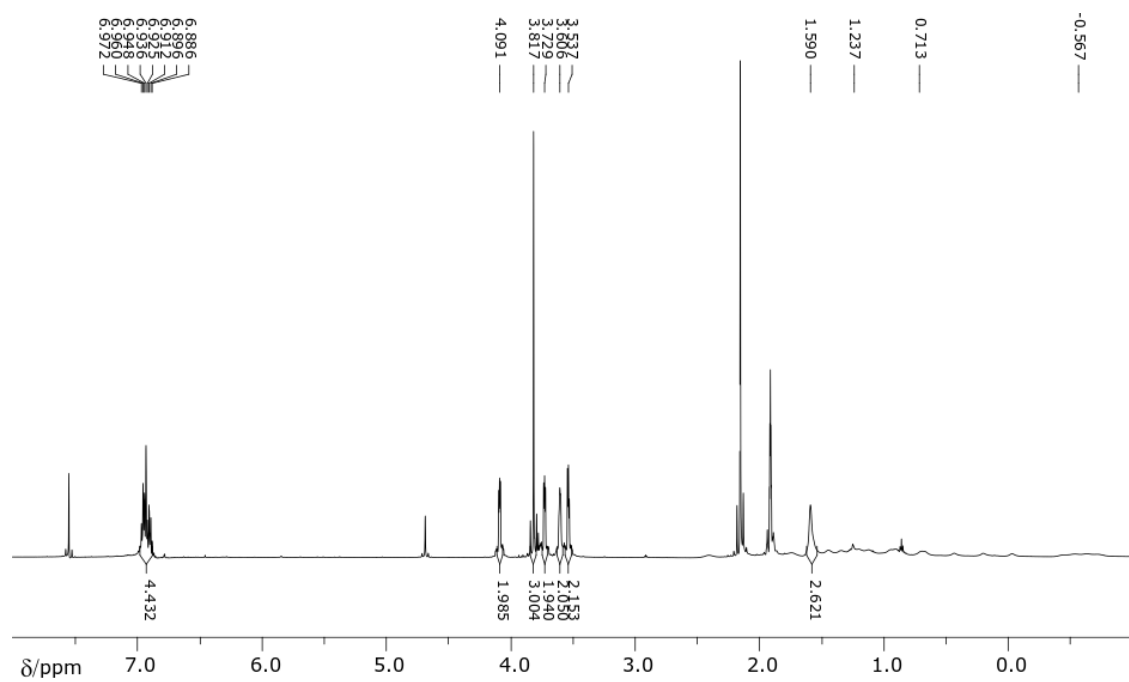

Fig S10b. <sup>1</sup>H NMR of compound **9**

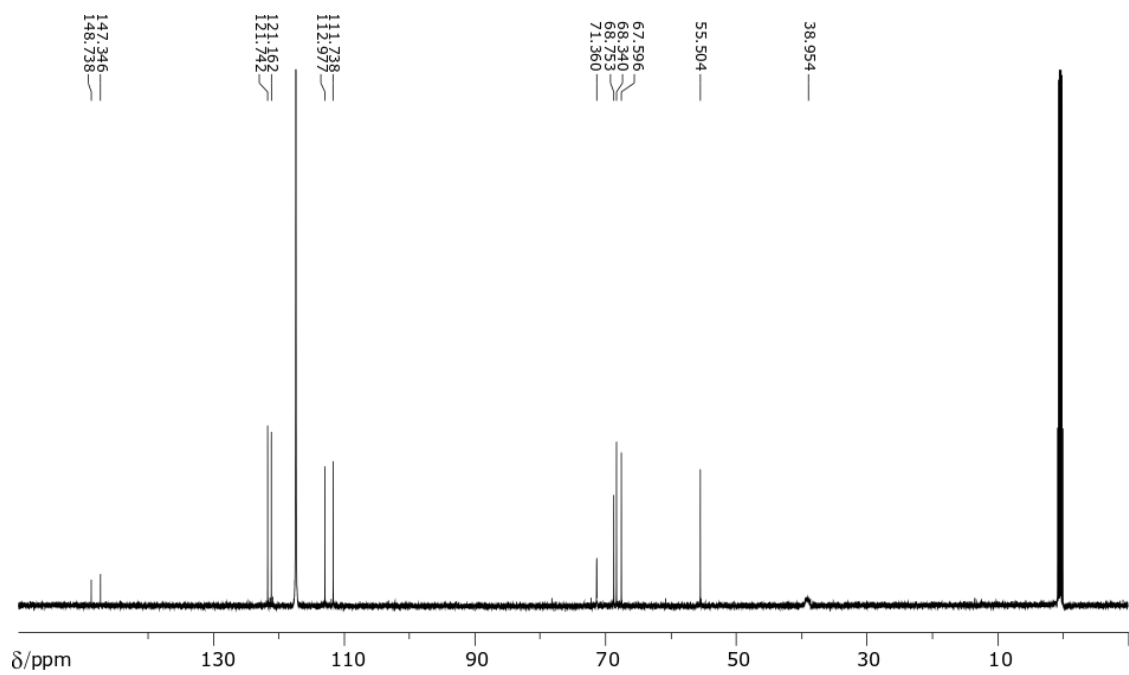

Fig S10c. <sup>13</sup>C NMR of compound **9**

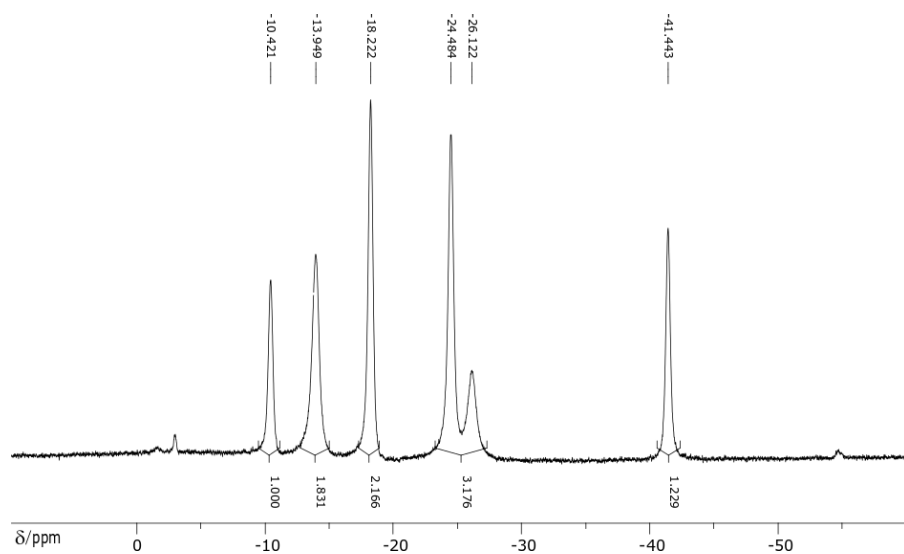

Fig S11a. <sup>11</sup>B NMR of compound **10<sup>2-</sup>**

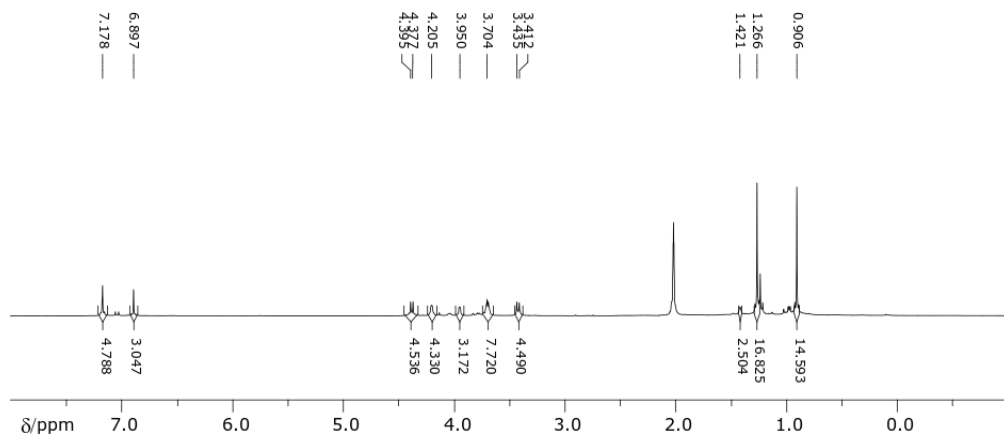

Fig S11b. <sup>1</sup>H NMR of compound **10<sup>2-</sup>**

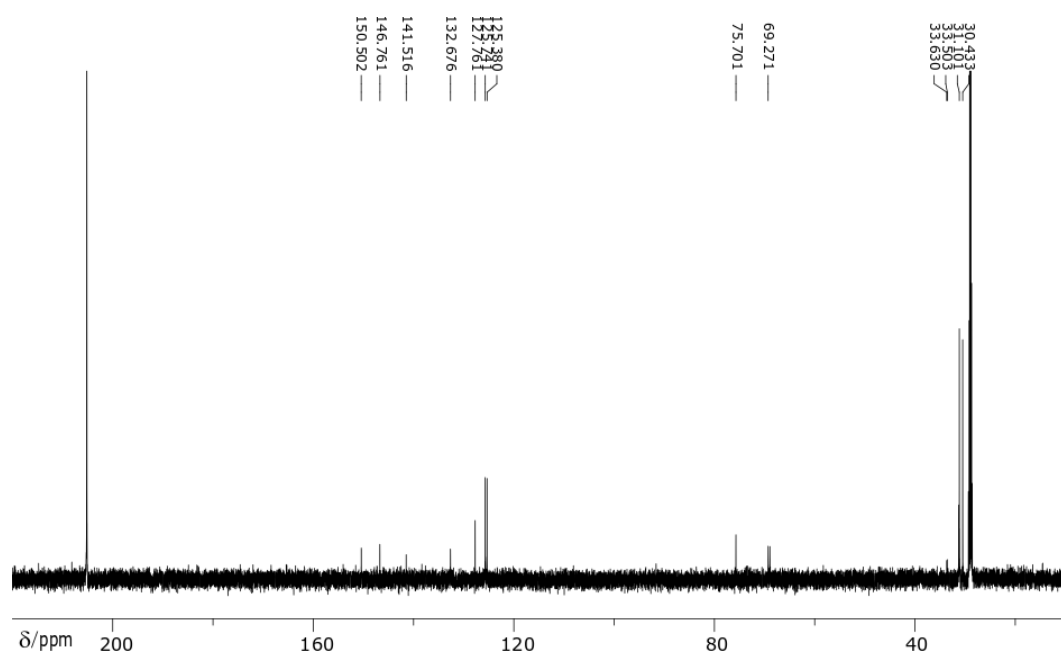

Fig S11c.  $^{13}\text{C}$  NMR of compound **102-**

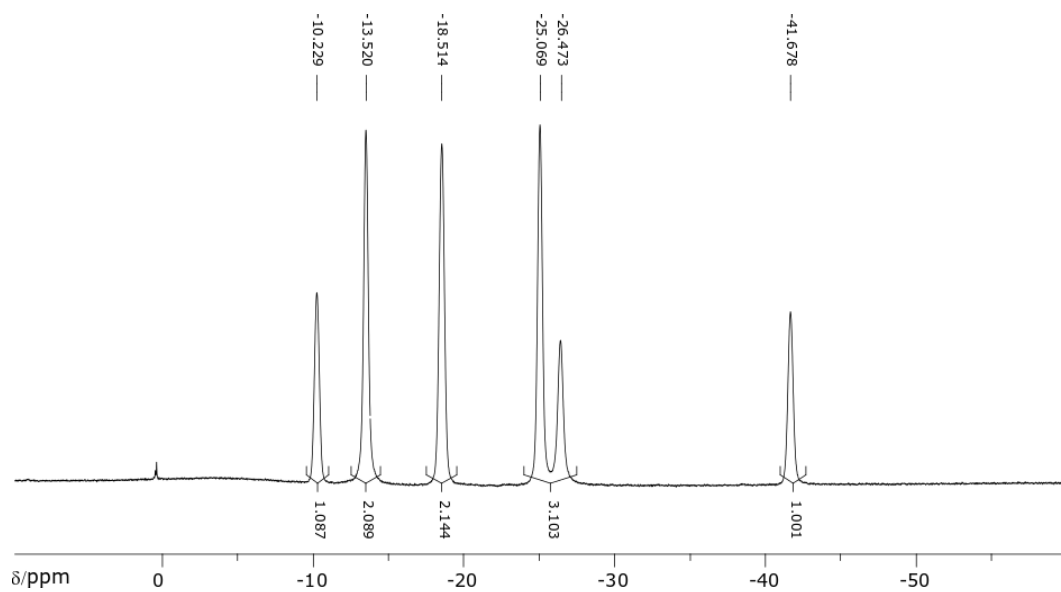

Fig S12a.  $^{11}\text{B}$  NMR of compound **11-**

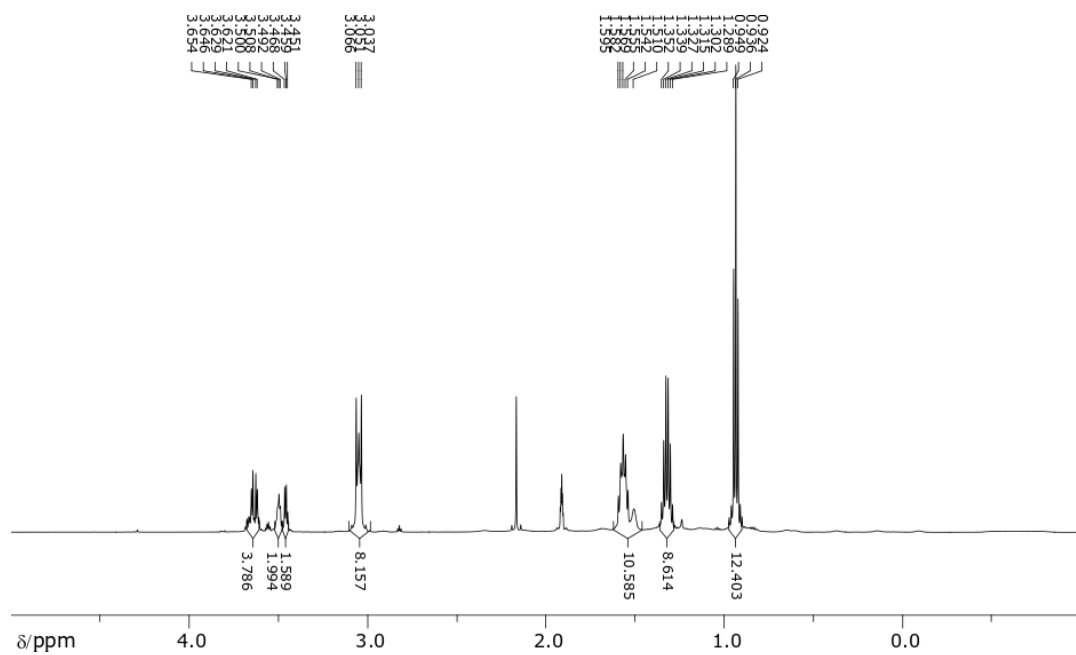

Fig S12b. <sup>1</sup>H NMR of compound **11<sup>-</sup>**

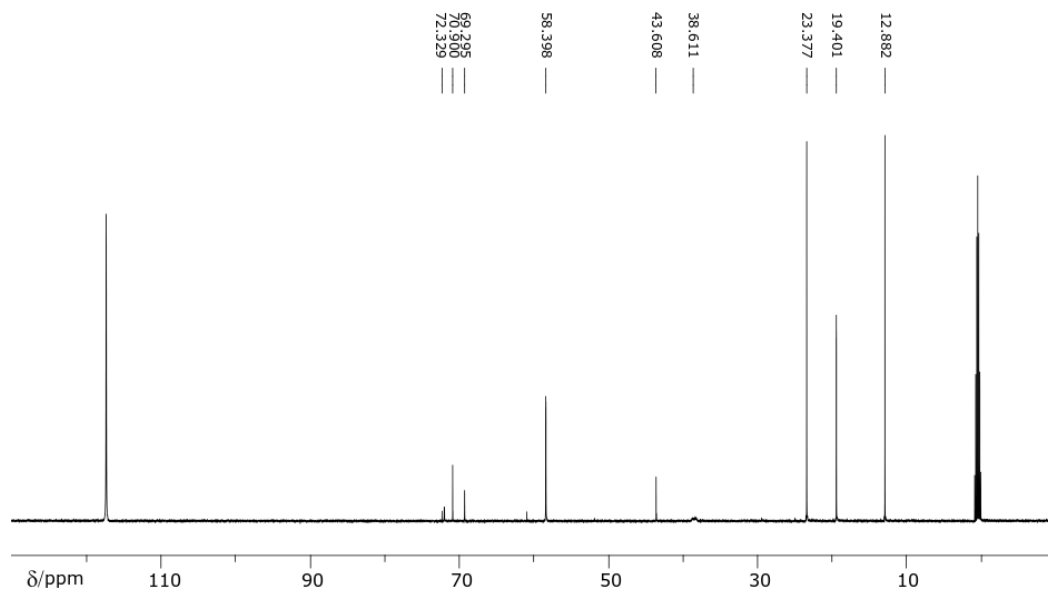

Fig S12c. <sup>13</sup>C NMR of compound **11<sup>-</sup>**

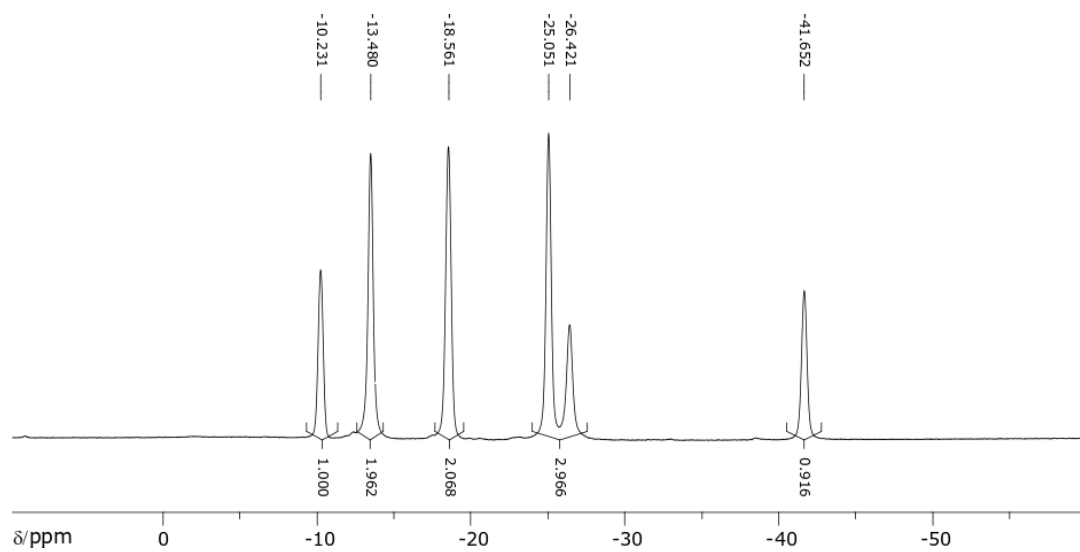

Fig S13a.  $^{11}\text{B}$  NMR of compound **12<sup>-</sup>**

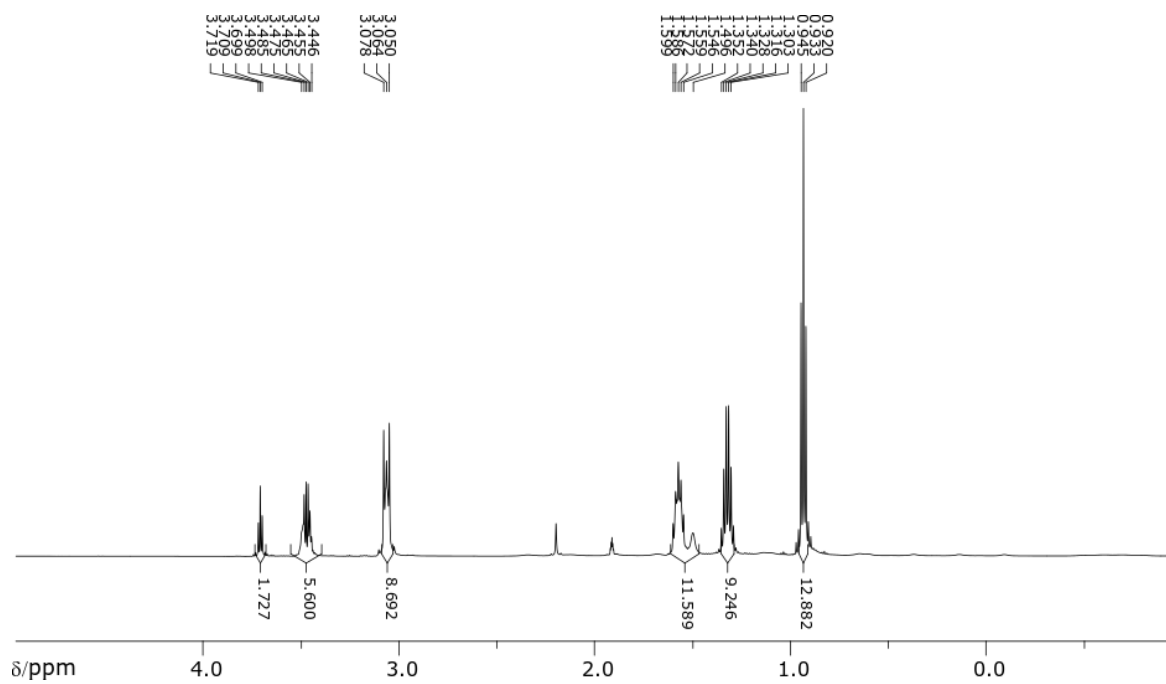

Fig S13b.  $^1\text{H}$  NMR of compound **12<sup>-</sup>**

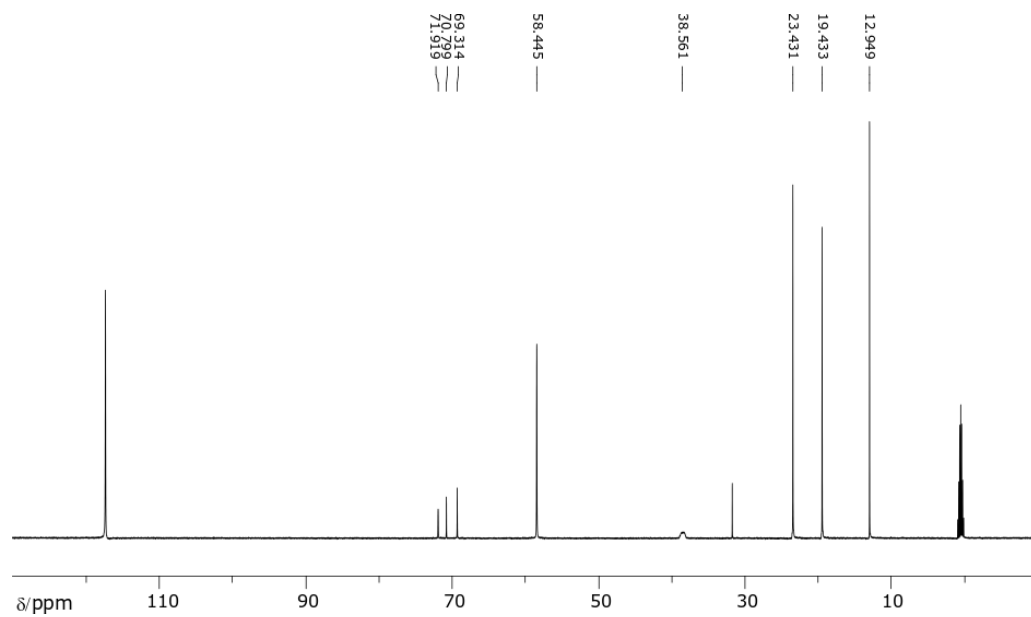

Fig S13c.  $^{13}\text{C}$  NMR of compound **12<sup>-</sup>**

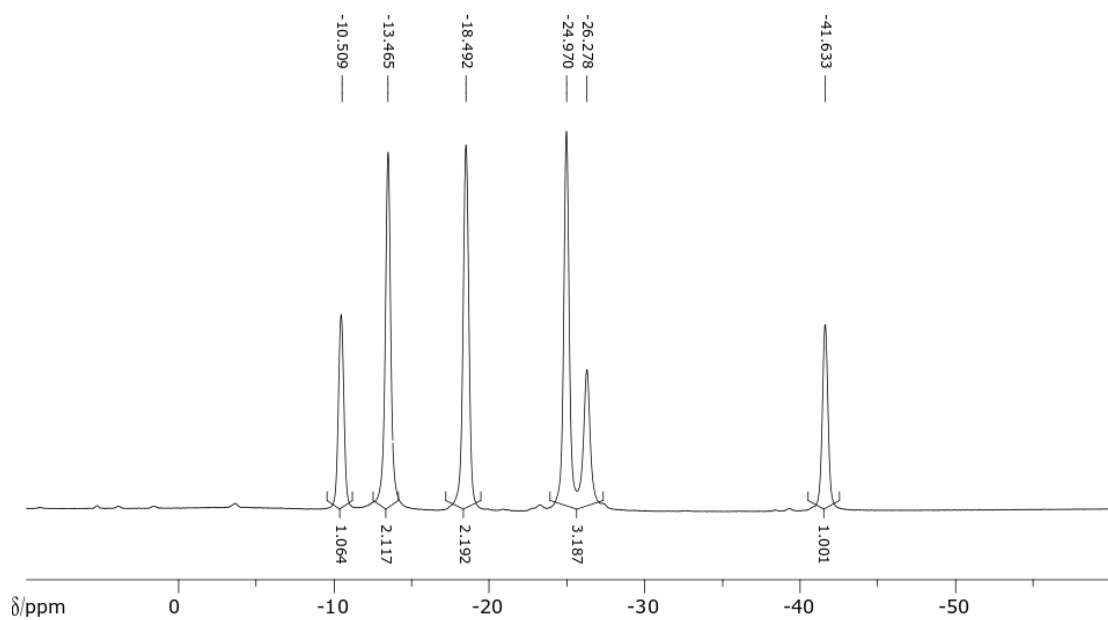

Fig S14a.  $^{11}\text{B}$  NMR of compound **13<sup>-</sup>**

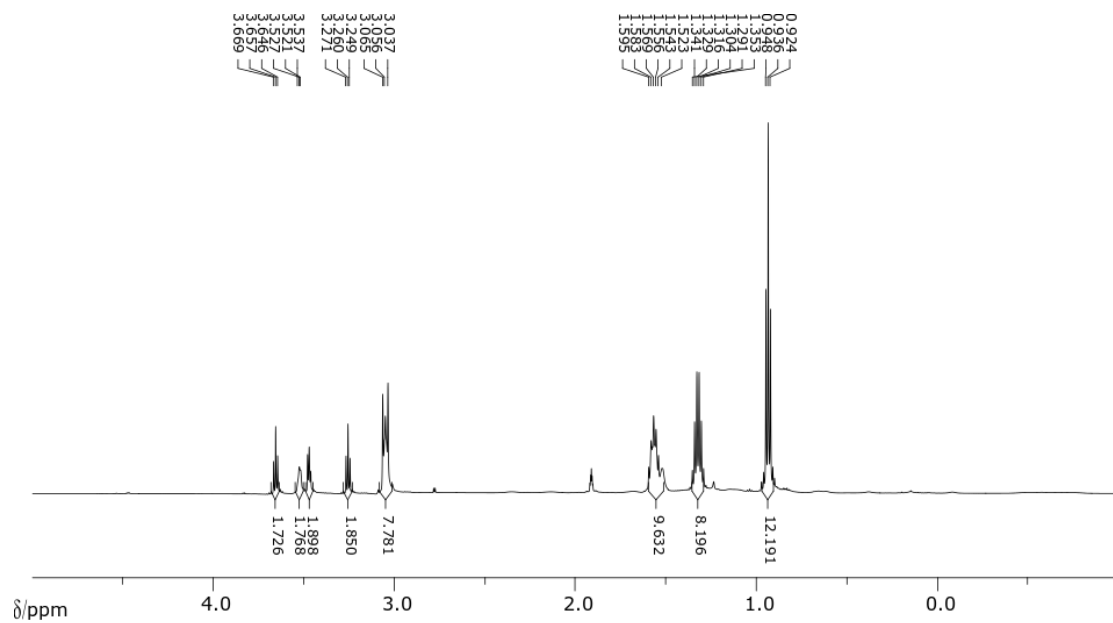

Fig S14b. <sup>1</sup>H NMR of compound **13<sup>-</sup>**

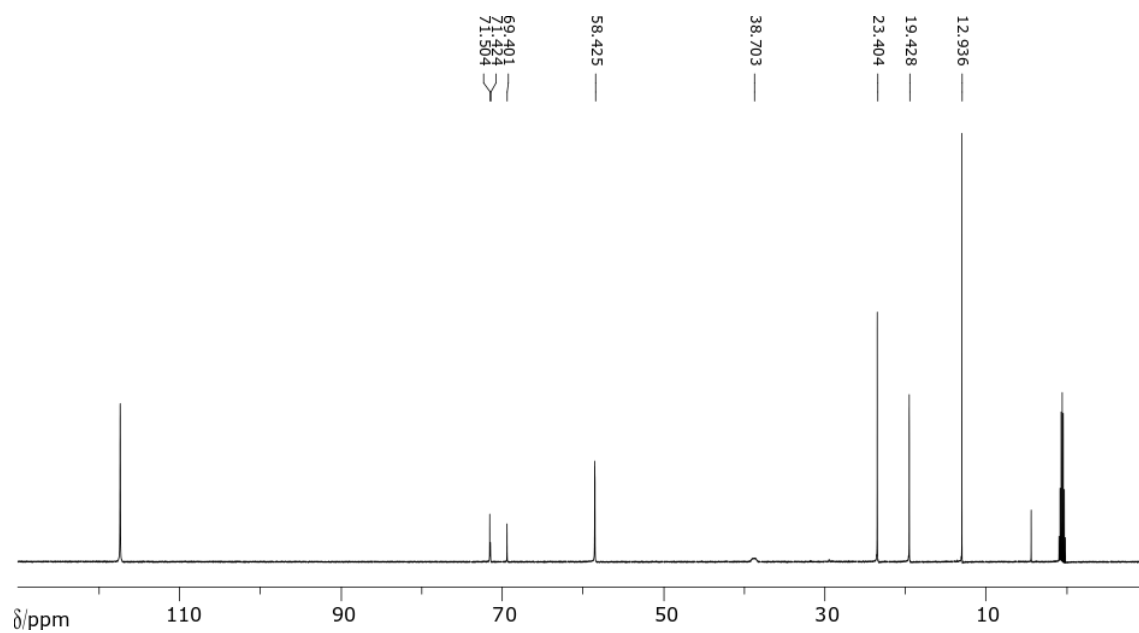

Fig S14c. <sup>13</sup>C NMR of compound **13<sup>-</sup>**

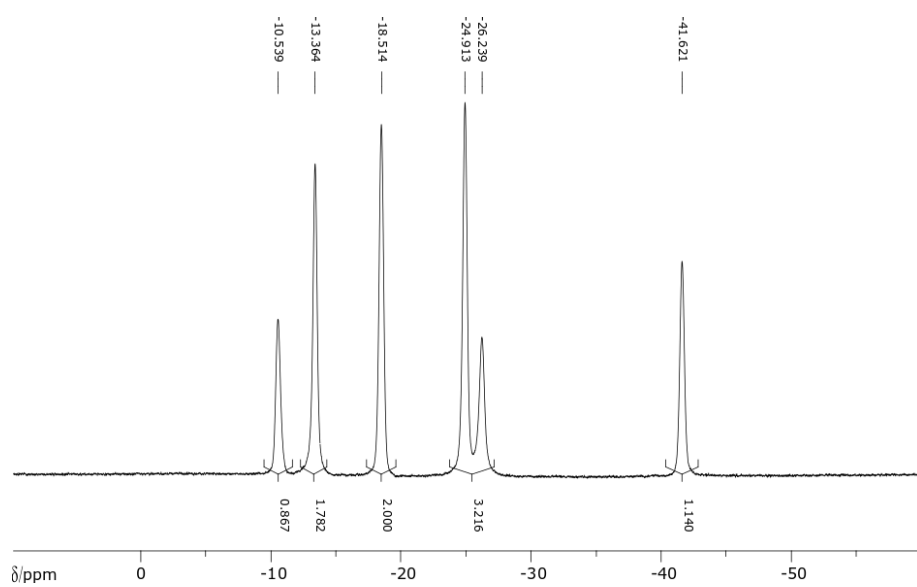

Fig S15a. <sup>11</sup>B NMR of compound **14<sup>-</sup>**

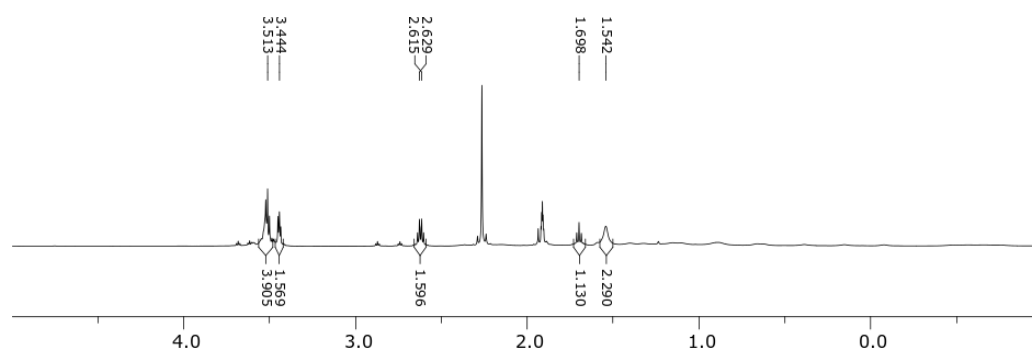

Fig S15b. <sup>1</sup>H NMR of compound **14<sup>-</sup>**



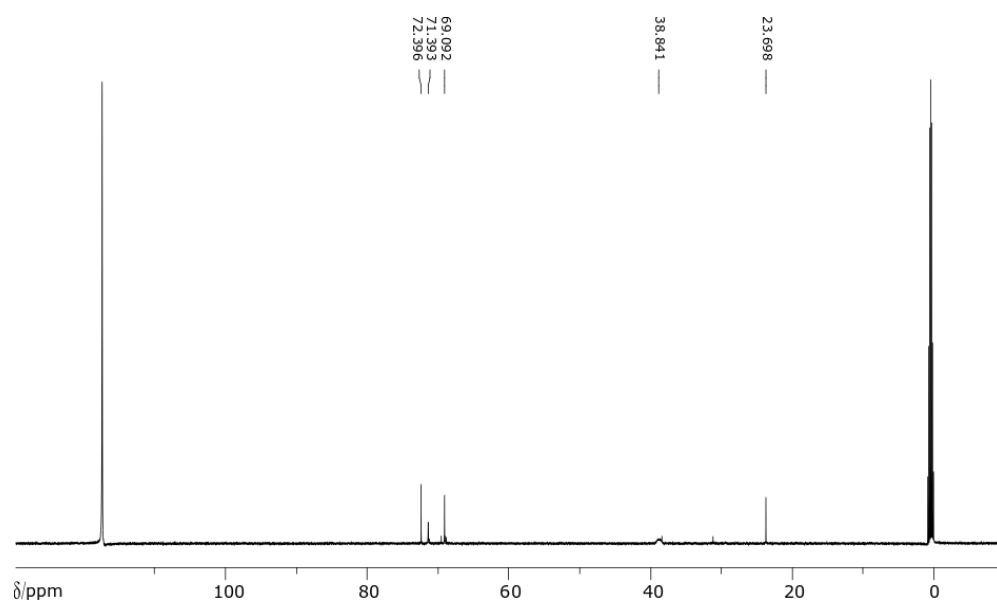

Fig S15c.  $^{13}\text{C}$  NMR of compound **14<sup>-</sup>**

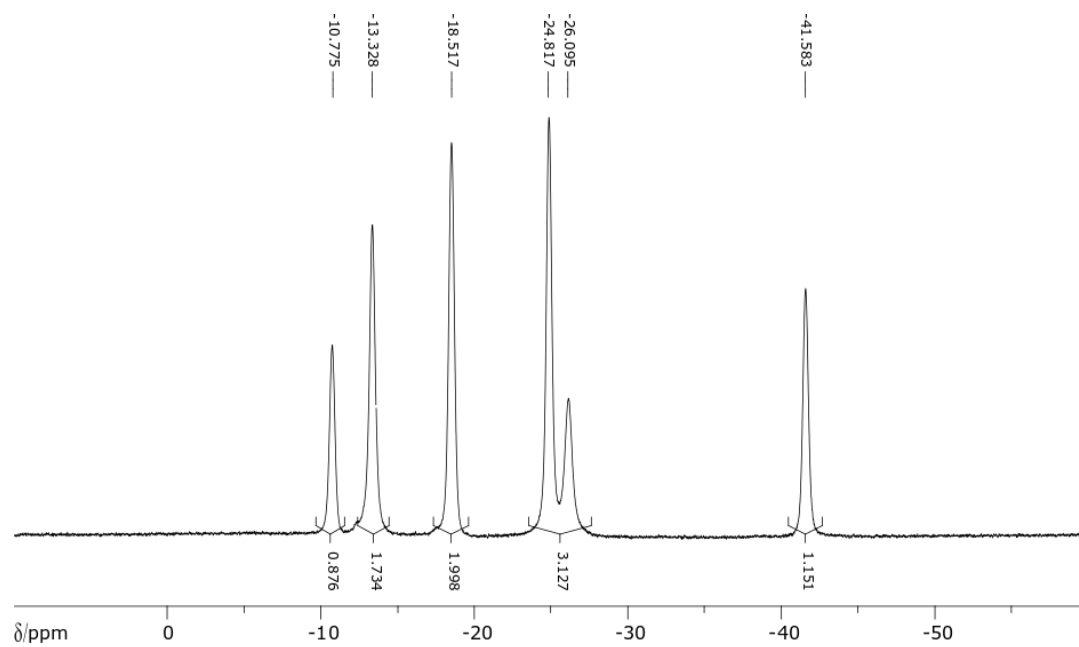

Fig S16a.  $^{11}\text{B}$  NMR of compound **15<sup>2-</sup>**

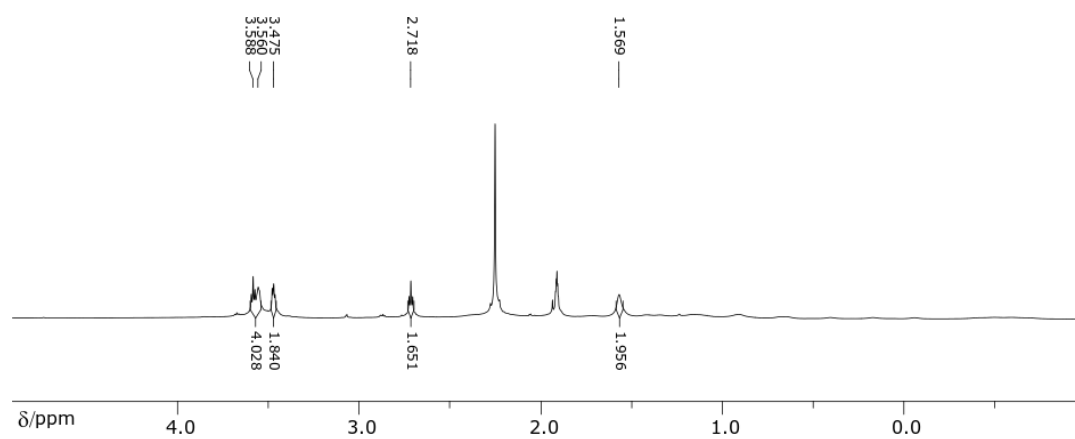

Fig S16b. <sup>1</sup>H NMR of compound **15**<sup>2-</sup>

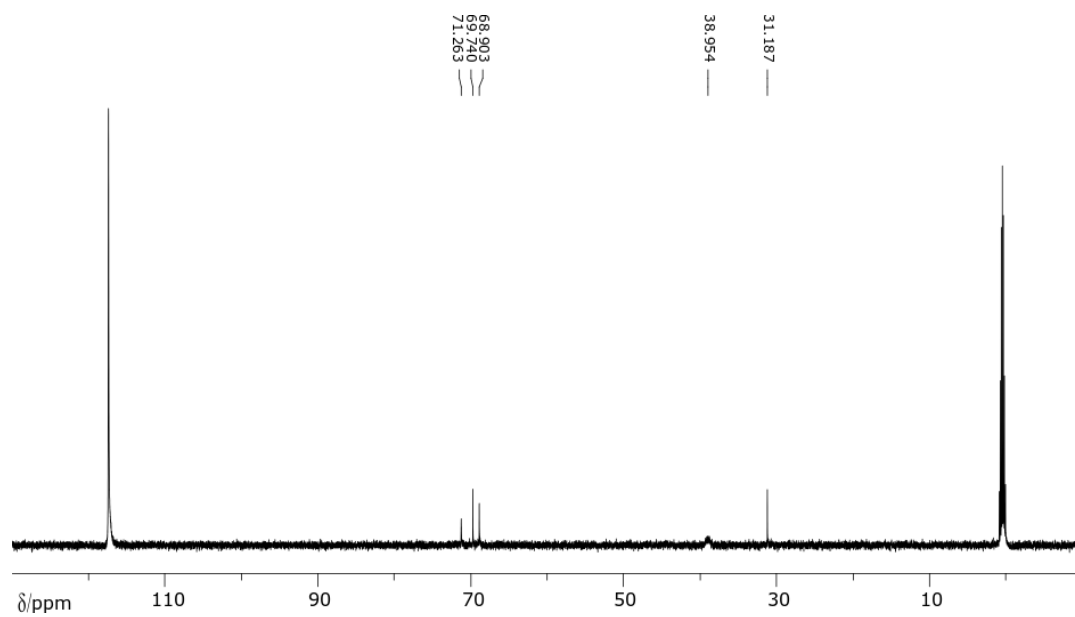

Fig S16c. <sup>13</sup>C NMR of compound **15**<sup>2-</sup>

### III. Mass Spectra

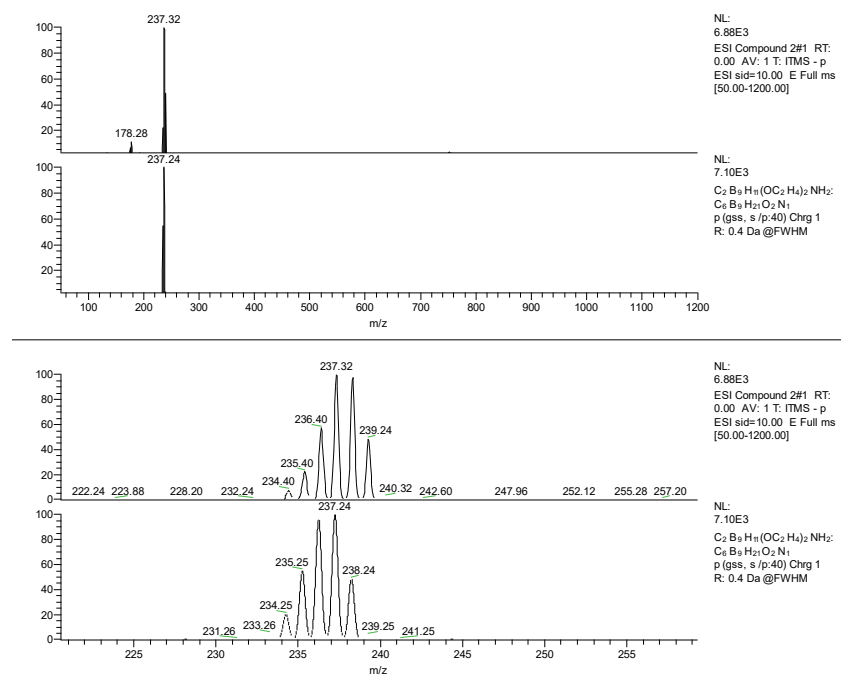

Fig S17. MS spectra of compound 2

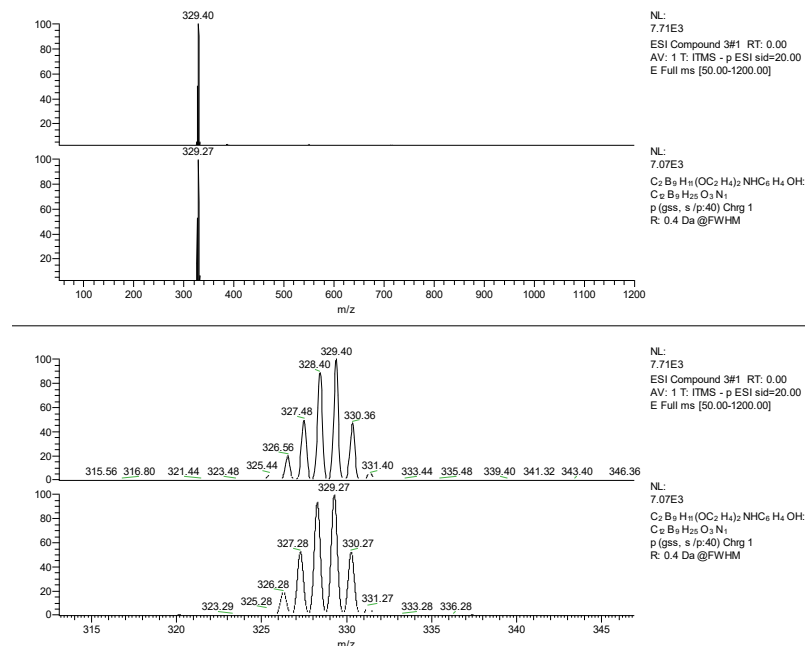

Fig S18. MS spectra of compound 3

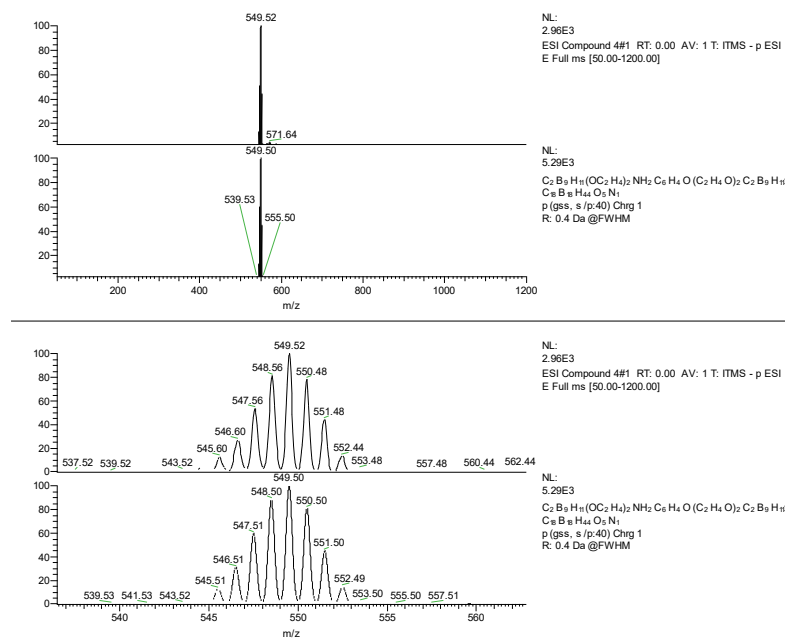

Fig S19. MS spectra of compound 4

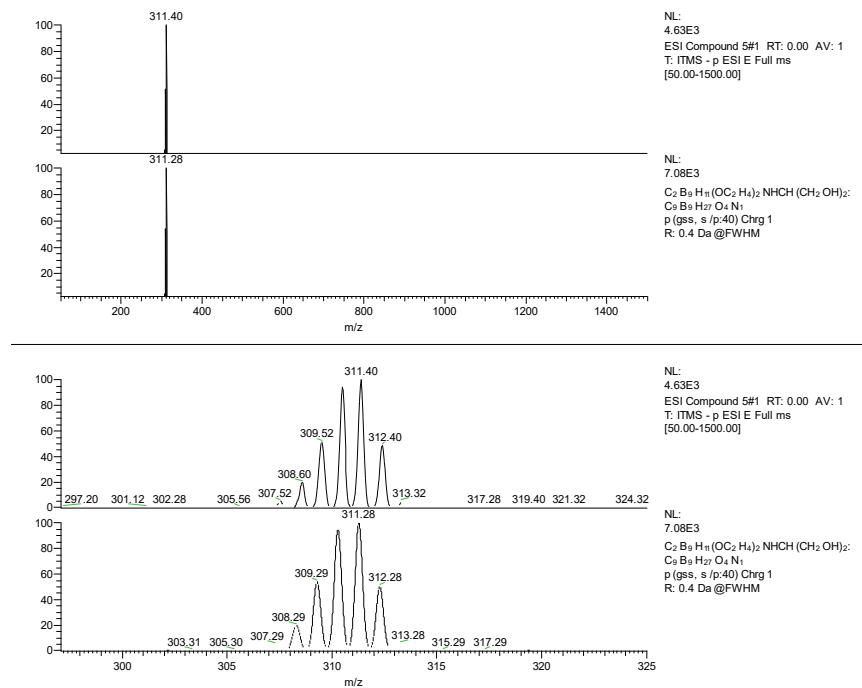

Fig S20. MS spectra of compound 5

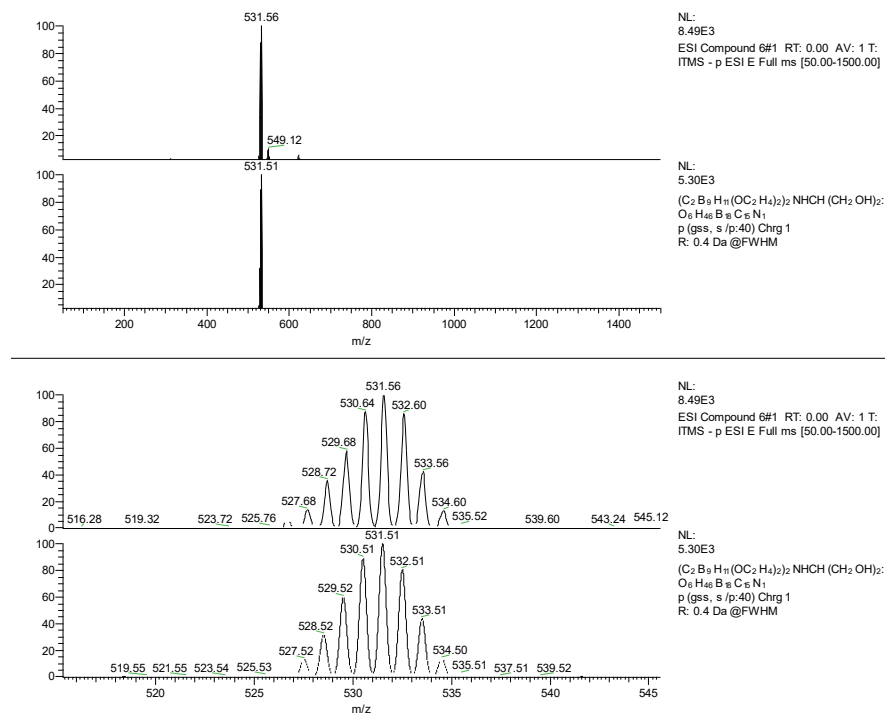

Fig S21. MS spectra of compound 6

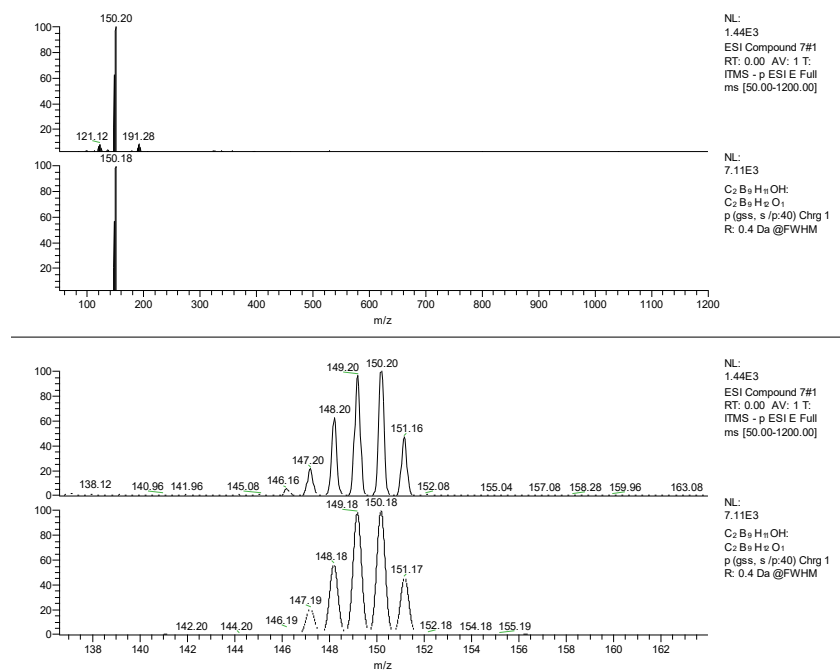

Fig S22. MS spectra of compound 7

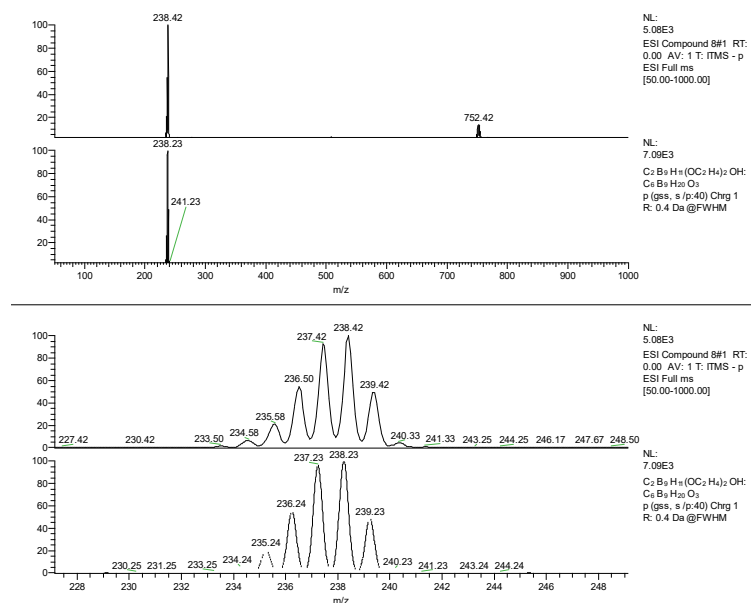

Fig S23. MS spectra of compound 8<sup>-</sup>

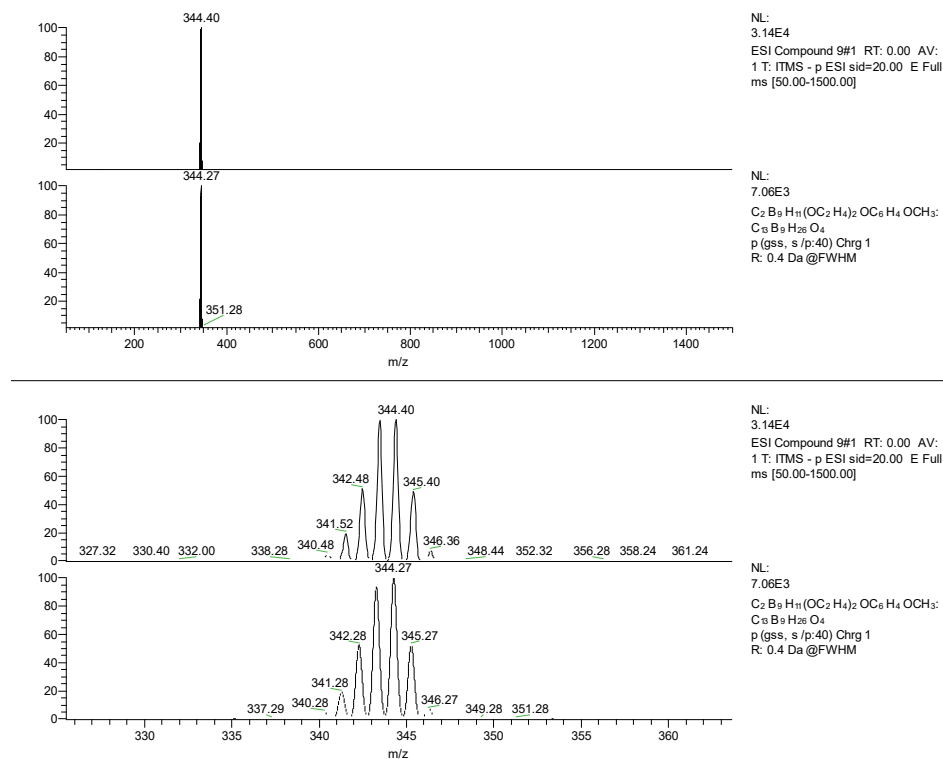

Fig S24. MS spectra of compound 9<sup>-</sup>

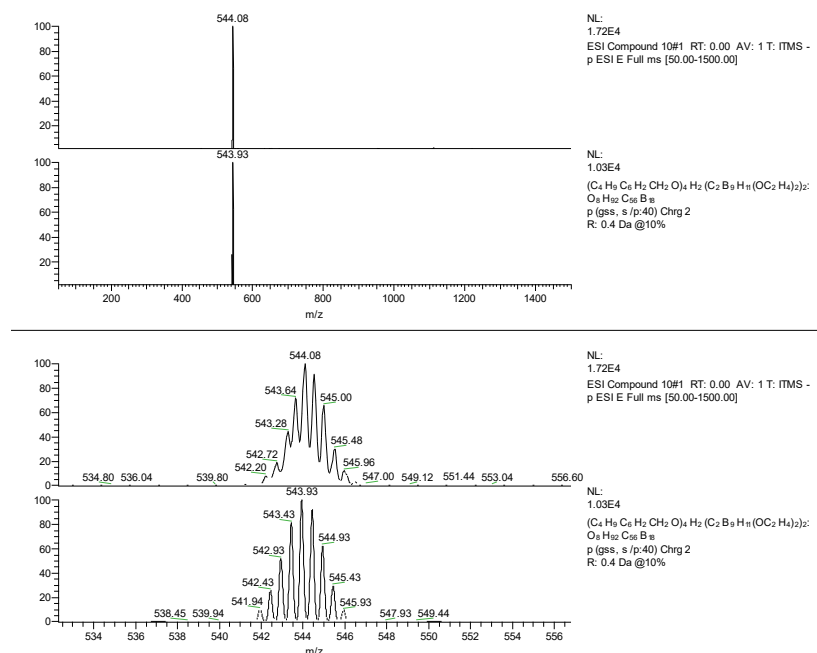

Fig S25. MS spectra of compound **10<sup>2-</sup>**

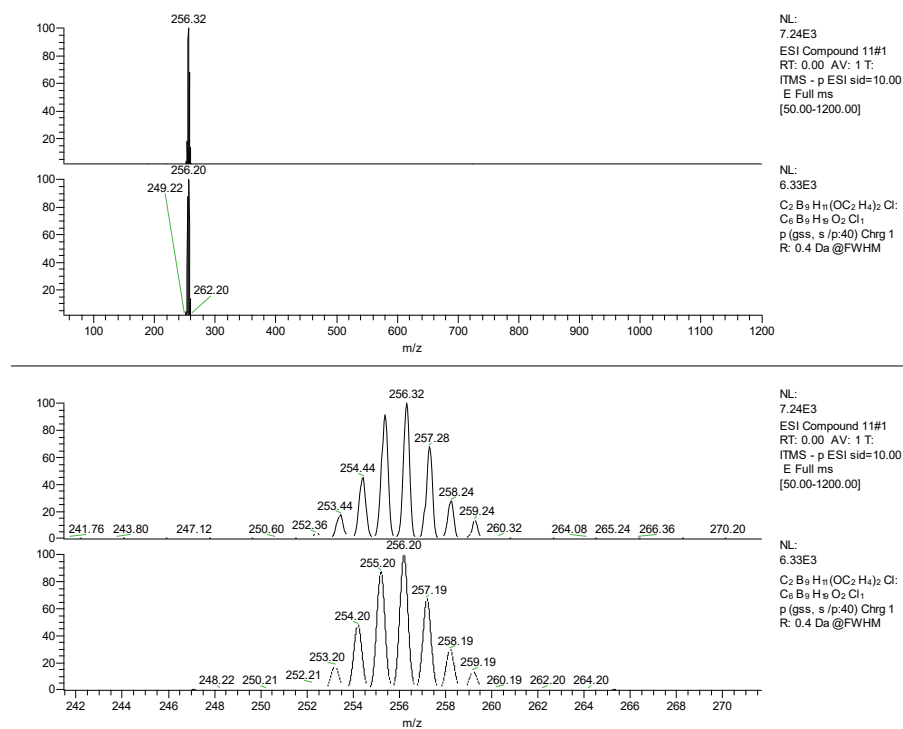

Fig S26. MS spectra of compound **11<sup>+</sup>**

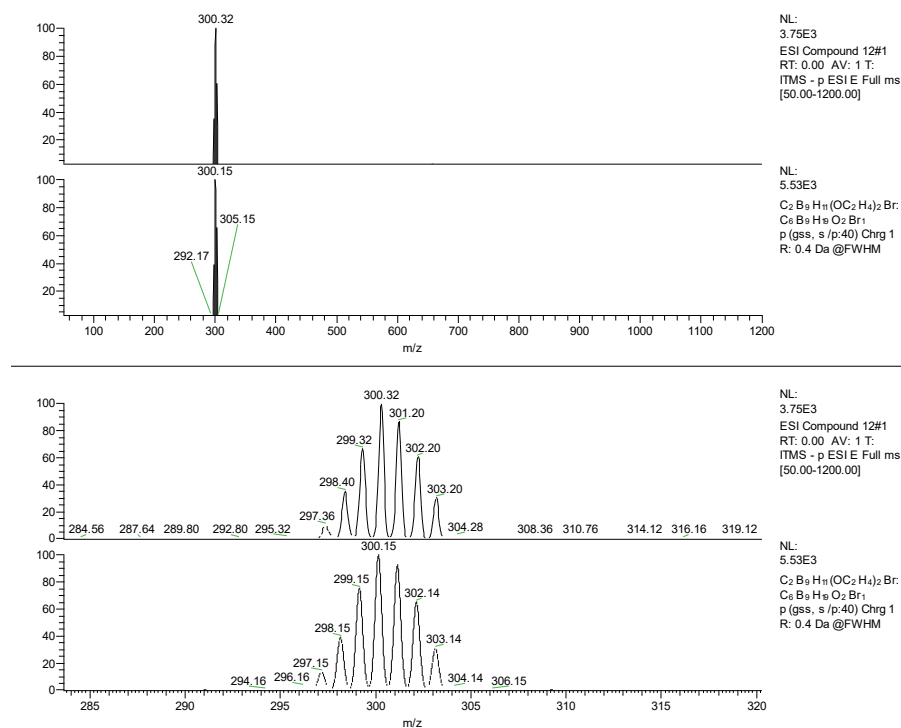

Fig S27. MS spectra of compound 12<sup>-</sup>

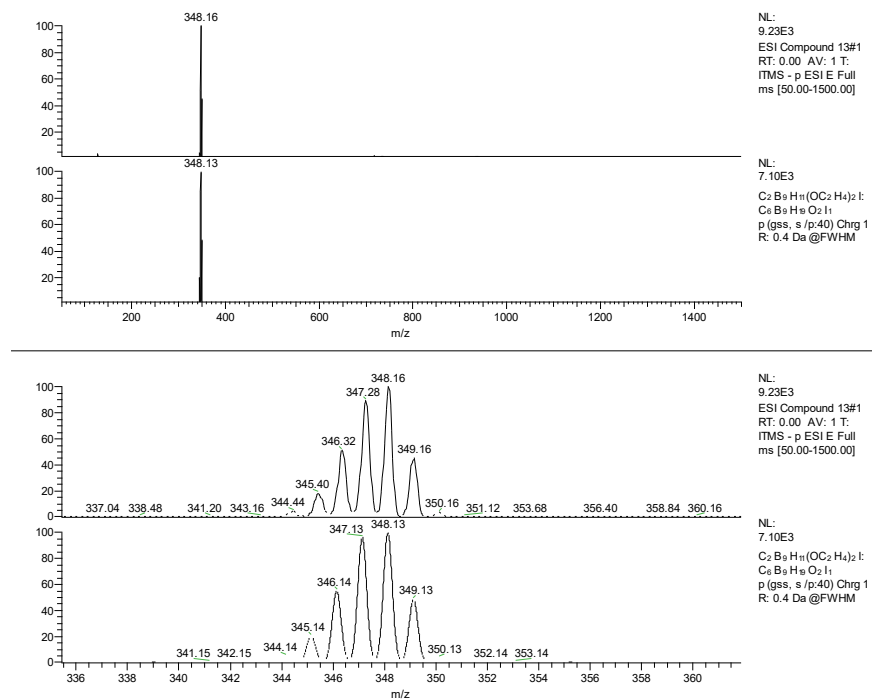

Fig S28. MS spectra of compound 13<sup>-</sup>



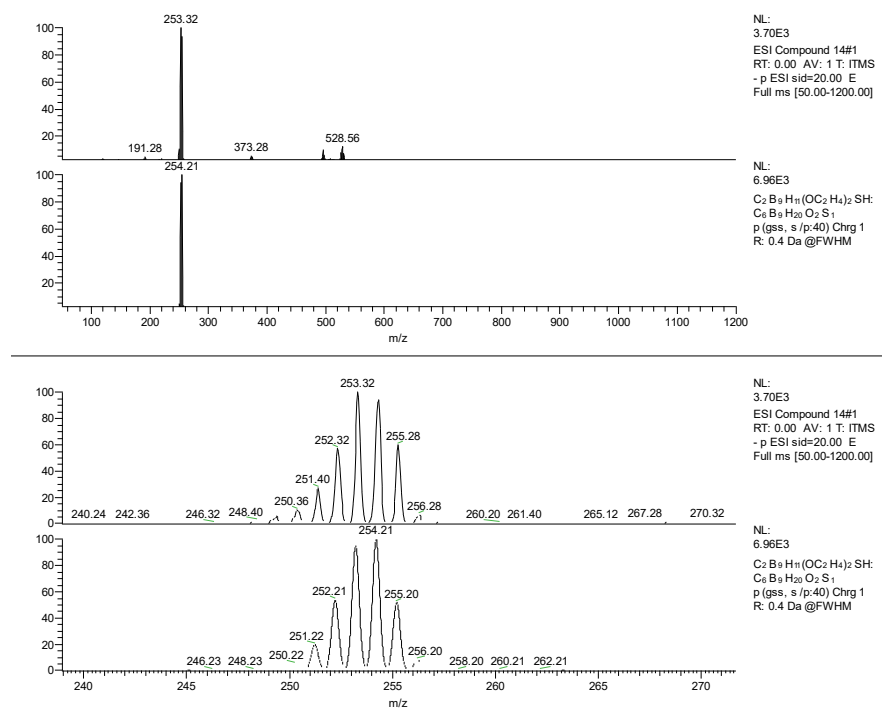

Fig S29. MS spectra of compound 14<sup>-</sup>

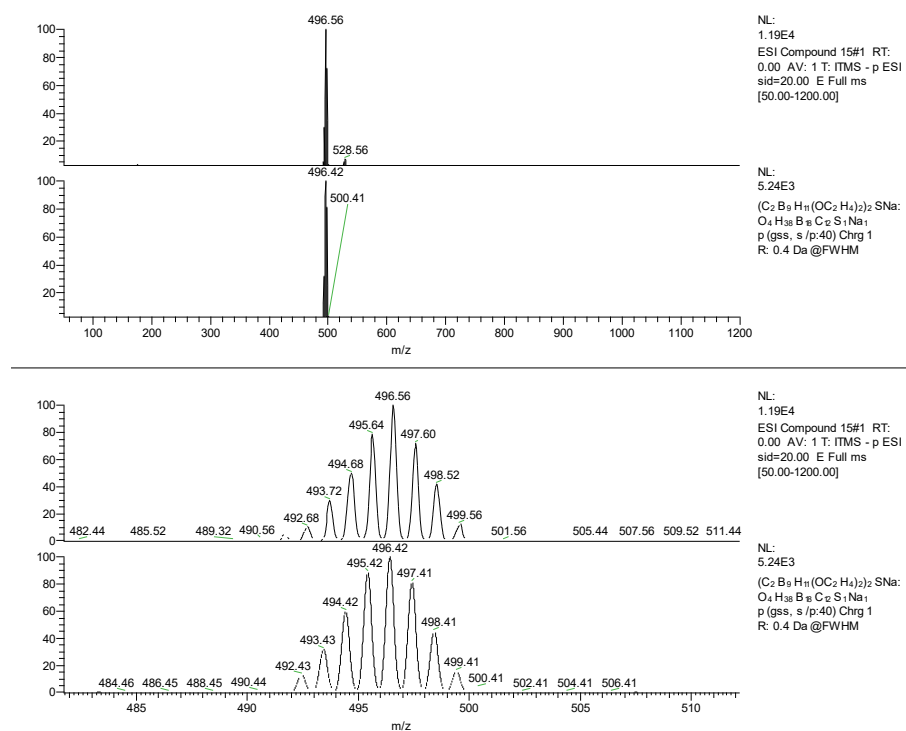

Fig S30. MS spectra of compound 15<sup>2-</sup>
